# Supplementary material for: MicroRNA expression profile in head and neck cancer: HOX-cluster embedded microRNA-196a and microRNA-10b dysregulation implicated in cell proliferation
Source: PubMed Central journal article supplement (PMC3826519; doi:10.1186/1471-2407-13-533), 2013-11-09
Supplement: 1471-2407-13-533-S1.pdf [file 1471-2407-13-533-S1.pdf]

| <b>miRNA</b> | <b>Source</b>                                                         | <b>Confidence</b>                               | <b>Symbol</b> |
|--------------|-----------------------------------------------------------------------|-------------------------------------------------|---------------|
| hsa-miR-1    | TarBase                                                               | Experimentally Observed                         | ABHD11        |
| hsa-miR-1    | TarBase TargetScan<br>Human miRecords                                 | Experimentally Observed                         | ACPL2         |
| hsa-miR-1    | TarBase TargetScan<br>Human miRecords                                 | Experimentally Observed                         | ADAR          |
| hsa-miR-1    | TarBase TargetScan<br>Human                                           | Experimentally Observed                         | ADPGK         |
| hsa-miR-1    | TarBase                                                               | Experimentally Observed                         | AGMAT         |
| hsa-miR-1    | TarBase                                                               | Experimentally Observed                         | AGRN          |
| hsa-miR-1    | TarBase TargetScan<br>Human miRecords                                 | Experimentally Observed                         | ANKIB1        |
| hsa-miR-1    | TarBase TargetScan<br>Human miRecords                                 | Experimentally Observed                         | ANKRD29       |
| hsa-miR-1    | TarBase TargetScan<br>Human                                           | Experimentally Observed                         | ANP32B        |
| hsa-miR-1    | TarBase                                                               | Experimentally Observed                         | ANPEP         |
| hsa-miR-1    | TarBase TargetScan<br>Human                                           | Experimentally Observed                         | ANXA2         |
| hsa-miR-1    | TarBase                                                               | Experimentally Observed                         | AP3B1         |
| hsa-miR-1    | TarBase TargetScan<br>Human                                           | Experimentally Observed                         | AP3D1         |
| hsa-miR-1    | TarBase TargetScan<br>Human miRecords                                 | Experimentally Observed                         | ARCN1         |
| hsa-miR-1    | TarBase TargetScan<br>Human miRecords                                 | Experimentally Observed                         | ARF3          |
| hsa-miR-1    | TarBase miRecords                                                     | Experimentally Observed                         | ARF4          |
| hsa-miR-1    | TarBase miRecords                                                     | Experimentally Observed                         | ARHGAP29      |
| hsa-miR-1    | TarBase TargetScan<br>Human miRecords                                 | Experimentally Observed                         | ARHGEF18      |
| hsa-miR-1    | TarBase                                                               | Experimentally Observed                         | ARID1A        |
| hsa-miR-1    | TarBase TargetScan<br>Human                                           | Experimentally Observed                         | ARID2         |
| hsa-miR-1    | TarBase TargetScan<br>Human                                           | Experimentally Observed                         | ASH2L         |
| hsa-miR-1    | TarBase                                                               | Experimentally Observed                         | ATP6V0A1      |
| hsa-miR-1    | TargetScan Human<br>miRecords                                         | Experimentally Observed                         | ATP6V1B2      |
| hsa-miR-1    | TarBase TargetScan<br>Human miRecords                                 | Experimentally Observed<br>Moderate (predicted) | AXL           |
| hsa-miR-1    | TarBase                                                               | Experimentally Observed                         | BCKDHB        |
| hsa-miR-1    | miRecords                                                             | Experimentally Observed                         | BCL2          |
| hsa-miR-1    | Ingenuity Expert<br>Findings TarBase<br>TargetScan Human<br>miRecords | Experimentally Observed                         | BDNF          |
| hsa-miR-1    | TarBase TargetScan                                                    | Experimentally Observed                         | BLCAP         |

| Human miRecords  |                            |                         |          |
|------------------|----------------------------|-------------------------|----------|
| <b>hsa-miR-1</b> | TarBase                    | Experimentally Observed | BRI3BP   |
| <b>hsa-miR-1</b> | TarBase miRecords          | Experimentally Observed | C12orf49 |
| <b>hsa-miR-1</b> | TarBase miRecords          | Experimentally Observed | C1orf56  |
| <b>hsa-miR-1</b> | TarBase TargetScan         | Experimentally Observed | C1orf96  |
| Human miRecords  |                            |                         |          |
| <b>hsa-miR-1</b> | miRecords                  | Experimentally Observed | Calm1    |
| <b>hsa-miR-1</b> | TarBase miRecords          | Experimentally Observed | CAND1    |
| <b>hsa-miR-1</b> | TarBase TargetScan         | Experimentally Observed | CAP1     |
| Human miRecords  |                            |                         |          |
| <b>hsa-miR-1</b> | TarBase                    | Experimentally Observed | CDCP1    |
| <b>hsa-miR-1</b> | TarBase TargetScan         | Experimentally Observed | CDK14    |
| Human miRecords  |                            |                         |          |
| <b>hsa-miR-1</b> | TargetScan Human miRecords | Experimentally Observed | CDK9     |
| <b>hsa-miR-1</b> | TarBase TargetScan         | Experimentally Observed | CERS2    |
| Human miRecords  |                            |                         |          |
| <b>hsa-miR-1</b> | TarBase TargetScan         | Experimentally Observed | CHST11   |
| Human miRecords  |                            |                         |          |
| <b>hsa-miR-1</b> | TarBase TargetScan         | Experimentally Observed | CHSY1    |
| Human miRecords  |                            |                         |          |
| <b>hsa-miR-1</b> | TarBase TargetScan         | Experimentally Observed | CLCN3    |
| Human miRecords  |                            |                         |          |
| <b>hsa-miR-1</b> | TargetScan Human miRecords | Experimentally Observed | CNN3     |
| <b>hsa-miR-1</b> | TarBase miRecords          | Experimentally Observed | CNOT6    |
| <b>hsa-miR-1</b> | TarBase TargetScan         | Experimentally Observed | COIL     |
| Human            |                            |                         |          |
| <b>hsa-miR-1</b> | TarBase TargetScan         | Experimentally Observed | CORO1C   |
| Human            |                            |                         |          |
| <b>hsa-miR-1</b> | TarBase                    | Experimentally Observed | CPOX     |
| <b>hsa-miR-1</b> | TarBase                    | Experimentally Observed | CSRP1    |
| <b>hsa-miR-1</b> | TarBase                    | Experimentally Observed | CTSC     |
| <b>hsa-miR-1</b> | TarBase TargetScan         | Experimentally Observed | DDX5     |
| Human miRecords  |                            |                         |          |
| <b>hsa-miR-1</b> | TarBase TargetScan         | Experimentally Observed | DHX15    |
| Human miRecords  |                            |                         |          |
| <b>hsa-miR-1</b> | TarBase                    | Experimentally Observed | DNAJB1   |
| <b>hsa-miR-1</b> | TarBase                    | Experimentally Observed | EGFR     |
| <b>hsa-miR-1</b> | TarBase                    | Experimentally Observed | EHMT1    |
| <b>hsa-miR-1</b> | TarBase TargetScan         | Experimentally Observed | EHMT2    |
| Human            |                            |                         |          |
| <b>hsa-miR-1</b> | TarBase TargetScan         | Experimentally Observed | EML4     |
| Human miRecords  |                            |                         |          |
| <b>hsa-miR-1</b> | TarBase TargetScan         | Experimentally Observed | EPB41L4B |
| Human miRecords  |                            |                         |          |
| <b>hsa-miR-1</b> | TarBase miRecords          | Experimentally Observed | ESR1     |

|                  |                                                          |                                                 |                   |
|------------------|----------------------------------------------------------|-------------------------------------------------|-------------------|
| <b>hsa-miR-1</b> | TarBase                                                  | Experimentally Observed                         | F2                |
| <b>hsa-miR-1</b> | TarBase miRecords                                        | Experimentally Observed                         | FAM57A            |
| <b>hsa-miR-1</b> | TarBase miRecords                                        | Experimentally Observed                         | FAM81A            |
| <b>hsa-miR-1</b> | TarBase TargetScan<br>Human miRecords                    | Experimentally Observed<br>Moderate (predicted) | FBLN2             |
| <b>hsa-miR-1</b> | TarBase                                                  | Experimentally Observed                         | FERMT2            |
| <b>hsa-miR-1</b> | TargetScan Human<br>miRecords                            | Experimentally Observed                         | FOXP1             |
| <b>hsa-miR-1</b> | TarBase miRecords                                        | Experimentally Observed                         | FSTL1             |
| <b>hsa-miR-1</b> | TarBase TargetScan<br>Human miRecords                    | Experimentally Observed                         | G6PD              |
| <b>hsa-miR-1</b> | TarBase TargetScan<br>Human                              | Experimentally Observed                         | GAK               |
| <b>hsa-miR-1</b> | TarBase miRecords                                        | Experimentally Observed                         | GCFC2             |
| <b>hsa-miR-1</b> | TarBase TargetScan<br>Human miRecords                    | Experimentally Observed                         | GCH1              |
| <b>hsa-miR-1</b> | TarBase TargetScan<br>Human miRecords                    | Experimentally Observed                         | GJA1              |
| <b>hsa-miR-1</b> | TarBase TargetScan<br>Human miRecords                    | Experimentally Observed                         | GNPDA2            |
| <b>hsa-miR-1</b> | TarBase TargetScan<br>Human                              | Experimentally Observed                         | GNPNAT1           |
| <b>hsa-miR-1</b> | TarBase                                                  | Experimentally Observed                         | GOLGA7            |
| <b>hsa-miR-1</b> | Ingenuity Expert<br>Findings TarBase<br>TargetScan Human | Experimentally Observed                         | GP2               |
| <b>hsa-miR-1</b> | TarBase TargetScan<br>Human miRecords                    | Experimentally Observed                         | H3F3A/H3F3<br>B   |
| <b>hsa-miR-1</b> | TarBase TargetScan<br>Human miRecords                    | Experimentally Observed                         | HAND2             |
| <b>hsa-miR-1</b> | TarBase miRecords                                        | Experimentally Observed                         | HCN2              |
| <b>hsa-miR-1</b> | TarBase miRecords                                        | Experimentally Observed                         | HCN4              |
| <b>hsa-miR-1</b> | TarBase TargetScan<br>Human miRecords                    | Experimentally Observed                         | HDAC4             |
| <b>hsa-miR-1</b> | TarBase miRecords                                        | Experimentally Observed                         | HIST1H3A          |
| <b>hsa-miR-1</b> | TarBase TargetScan<br>Human miRecords                    | Experimentally Observed<br>Moderate (predicted) | HPS4              |
| <b>hsa-miR-1</b> | TarBase miRecords                                        | Experimentally Observed                         | HSPA1A/HSP<br>A1B |
| <b>hsa-miR-1</b> | TarBase TargetScan<br>Human miRecords                    | Experimentally Observed                         | HSPD1             |
| <b>hsa-miR-1</b> | TarBase TargetScan<br>Human miRecords                    | Experimentally Observed                         | IFT52             |
| <b>hsa-miR-1</b> | TargetScan Human<br>miRecords                            | Experimentally Observed                         | IGF1              |
| <b>hsa-miR-1</b> | TarBase miRecords                                        | Experimentally Observed                         | INPP5F            |
| <b>hsa-miR-1</b> | TarBase TargetScan                                       | Experimentally Observed                         | IP6K2             |

| Human miRecords  |                                       |                                                 |          |
|------------------|---------------------------------------|-------------------------------------------------|----------|
| <b>hsa-miR-1</b> | TarBase                               | Experimentally Observed                         | IQGAP3   |
| <b>hsa-miR-1</b> | miRecords                             | Experimentally Observed                         | IRX5     |
| <b>hsa-miR-1</b> | TarBase miRecords                     | Experimentally Observed                         | ISY1     |
| <b>hsa-miR-1</b> | TarBase                               | Experimentally Observed                         | ITGB4    |
| <b>hsa-miR-1</b> | miRecords                             | Experimentally Observed                         | KCNE1    |
| <b>hsa-miR-1</b> | TarBase TargetScan<br>Human miRecords | Experimentally Observed                         | KCNJ2    |
| <b>hsa-miR-1</b> | TarBase                               | Experimentally Observed                         | KCNQ1    |
| <b>hsa-miR-1</b> | TarBase miRecords                     | Experimentally Observed                         | KIAA1598 |
| <b>hsa-miR-1</b> | TarBase TargetScan<br>Human miRecords | Experimentally Observed                         | KIF2A    |
| <b>hsa-miR-1</b> | TarBase TargetScan<br>Human miRecords | Experimentally Observed                         | KLHDC5   |
| <b>hsa-miR-1</b> | TargetScan Human<br>miRecords         | Experimentally Observed                         | LARP4    |
| <b>hsa-miR-1</b> | TarBase TargetScan<br>Human miRecords | Experimentally Observed                         | LASP1    |
| <b>hsa-miR-1</b> | TarBase TargetScan<br>Human miRecords | Experimentally Observed                         | LIN7C    |
| <b>hsa-miR-1</b> | TarBase                               | Experimentally Observed                         | LRP1     |
| <b>hsa-miR-1</b> | TarBase TargetScan<br>Human miRecords | Experimentally Observed                         | LRRC8A   |
| <b>hsa-miR-1</b> | TarBase miRecords                     | Experimentally Observed                         | LZTFL1   |
| <b>hsa-miR-1</b> | miRecords                             | Experimentally Observed                         | MEF2A    |
| <b>hsa-miR-1</b> | TarBase TargetScan<br>Human miRecords | Experimentally Observed                         | MET      |
| <b>hsa-miR-1</b> | TarBase miRecords                     | Experimentally Observed                         | MGC27345 |
| <b>hsa-miR-1</b> | TarBase TargetScan<br>Human miRecords | Experimentally Observed                         | MMD      |
| <b>hsa-miR-1</b> | TarBase                               | Experimentally Observed                         | MOV10    |
| <b>hsa-miR-1</b> | TarBase                               | Experimentally Observed                         | MRC2     |
| <b>hsa-miR-1</b> | TarBase                               | Experimentally Observed                         | MTHFD2   |
| <b>hsa-miR-1</b> | TarBase TargetScan<br>Human miRecords | Experimentally Observed                         | MTMR12   |
| <b>hsa-miR-1</b> | TarBase TargetScan<br>Human miRecords | Experimentally Observed                         | MTX1     |
| <b>hsa-miR-1</b> | TarBase TargetScan<br>Human miRecords | Experimentally Observed                         | MXD4     |
| <b>hsa-miR-1</b> | TarBase TargetScan<br>Human miRecords | Experimentally Observed<br>Moderate (predicted) | NETO2    |
| <b>hsa-miR-1</b> | TarBase TargetScan<br>Human           | Experimentally Observed<br>Moderate (predicted) | NOTCH2   |
| <b>hsa-miR-1</b> | TargetScan Human<br>miRecords         | Experimentally Observed                         | NOTCH3   |
| <b>hsa-miR-1</b> | Ingenuity Expert<br>Findings TarBase  | Experimentally Observed                         | NRP1     |

|                  |                                    |                                              |           |
|------------------|------------------------------------|----------------------------------------------|-----------|
|                  | TargetScan Human                   |                                              |           |
| <b>hsa-miR-1</b> | TarBase TargetScan Human miRecords | Experimentally Observed                      | OAT       |
| <b>hsa-miR-1</b> | TarBase TargetScan Human miRecords | Experimentally Observed                      | OSBPL7    |
| <b>hsa-miR-1</b> | TarBase TargetScan Human miRecords | Experimentally Observed                      | PDCD4     |
| <b>hsa-miR-1</b> | TarBase                            | Experimentally Observed                      | PDLIM7    |
| <b>hsa-miR-1</b> | TarBase TargetScan Human miRecords | Experimentally Observed                      | PGM2      |
| <b>hsa-miR-1</b> | TarBase TargetScan Human           | Experimentally Observed                      | PICALM    |
| <b>hsa-miR-1</b> | TargetScan Human miRecords         | Experimentally Observed                      | PIM1      |
| <b>hsa-miR-1</b> | TarBase miRecords                  | Experimentally Observed                      | PLEKHB2   |
| <b>hsa-miR-1</b> | TarBase miRecords                  | Experimentally Observed                      | PLEKHG2   |
| <b>hsa-miR-1</b> | TarBase TargetScan Human miRecords | Experimentally Observed                      | PNP       |
| <b>hsa-miR-1</b> | TarBase TargetScan Human miRecords | Experimentally Observed                      | POGK      |
| <b>hsa-miR-1</b> | TarBase TargetScan Human miRecords | Experimentally Observed                      | POLA1     |
| <b>hsa-miR-1</b> | TarBase                            | Experimentally Observed                      | POLA2     |
| <b>hsa-miR-1</b> | TarBase TargetScan Human miRecords | Experimentally Observed Moderate (predicted) | POLR2K    |
| <b>hsa-miR-1</b> | miRecords                          | Experimentally Observed                      | POM121    |
| <b>hsa-miR-1</b> | TarBase                            | Experimentally Observed                      | POM121C   |
| <b>hsa-miR-1</b> | TarBase TargetScan Human           | Experimentally Observed                      | PPIB      |
| <b>hsa-miR-1</b> | TarBase TargetScan Human miRecords | Experimentally Observed                      | PREX1     |
| <b>hsa-miR-1</b> | TarBase TargetScan Human           | Experimentally Observed Moderate (predicted) | PRSS21    |
| <b>hsa-miR-1</b> | TarBase TargetScan Human           | Experimentally Observed                      | PTBP1     |
| <b>hsa-miR-1</b> | TarBase                            | Experimentally Observed                      | PTBP2     |
| <b>hsa-miR-1</b> | TarBase TargetScan Human           | Experimentally Observed                      | PTMA      |
| <b>hsa-miR-1</b> | TarBase TargetScan Human miRecords | Experimentally Observed                      | PTPLAD1   |
| <b>hsa-miR-1</b> | TarBase                            | Experimentally Observed                      | PTPLB     |
| <b>hsa-miR-1</b> | TarBase TargetScan Human           | Experimentally Observed Moderate (predicted) | PTPRF     |
| <b>hsa-miR-1</b> | TarBase                            | Experimentally Observed                      | PWP1      |
| <b>hsa-miR-1</b> | TarBase miRecords                  | Experimentally Observed                      | RAB11FIP2 |
| <b>hsa-miR-1</b> | TarBase miRecords                  | Experimentally Observed                      | RABGAP1L  |
| <b>hsa-miR-1</b> | TarBase miRecords                  | Experimentally Observed                      | RABL2A    |

|                  |                                                                       |                                                 |          |
|------------------|-----------------------------------------------------------------------|-------------------------------------------------|----------|
| <b>hsa-miR-1</b> | TarBase miRecords                                                     | Experimentally Observed                         | RABL2B   |
| <b>hsa-miR-1</b> | TarBase TargetScan<br>Human miRecords                                 | Experimentally Observed<br>Moderate (predicted) | RBM47    |
| <b>hsa-miR-1</b> | TarBase                                                               | Experimentally Observed                         | RFT1     |
| <b>hsa-miR-1</b> | TarBase TargetScan<br>Human miRecords                                 | Experimentally Observed                         | RNF138   |
| <b>hsa-miR-1</b> | TarBase                                                               | Experimentally Observed                         | SAC3D1   |
| <b>hsa-miR-1</b> | TarBase miRecords                                                     | Experimentally Observed                         | SDC4     |
| <b>hsa-miR-1</b> | TarBase                                                               | Experimentally Observed                         | SEC23IP  |
| <b>hsa-miR-1</b> | Ingenuity Expert<br>Findings TarBase<br>TargetScan Human<br>miRecords | Experimentally Observed                         | SERP1    |
| <b>hsa-miR-1</b> | TarBase miRecords                                                     | Experimentally Observed                         | SERPINB5 |
| <b>hsa-miR-1</b> | TarBase                                                               | Experimentally Observed                         | SFXN1    |
| <b>hsa-miR-1</b> | TarBase TargetScan<br>Human miRecords                                 | Experimentally Observed<br>Moderate (predicted) | SH2D4A   |
| <b>hsa-miR-1</b> | TarBase TargetScan<br>Human                                           | Experimentally Observed                         | SH3BGRL3 |
| <b>hsa-miR-1</b> | TarBase TargetScan<br>Human miRecords                                 | Experimentally Observed                         | SH3PXD2B |
| <b>hsa-miR-1</b> | TarBase miRecords                                                     | Experimentally Observed                         | SLC16A9  |
| <b>hsa-miR-1</b> | TarBase TargetScan<br>Human                                           | Experimentally Observed                         | SLC25A1  |
| <b>hsa-miR-1</b> | TarBase TargetScan<br>Human                                           | Experimentally Observed                         | SLC25A22 |
| <b>hsa-miR-1</b> | TarBase TargetScan<br>Human miRecords                                 | Experimentally Observed                         | SLC25A30 |
| <b>hsa-miR-1</b> | TarBase TargetScan<br>Human miRecords                                 | Experimentally Observed                         | SLC44A1  |
| <b>hsa-miR-1</b> | TarBase                                                               | Experimentally Observed                         | SNX6     |
| <b>hsa-miR-1</b> | TarBase TargetScan<br>Human miRecords                                 | Experimentally Observed                         | SRSF9    |
| <b>hsa-miR-1</b> | TarBase TargetScan<br>Human miRecords                                 | Experimentally Observed                         | SRXN1    |
| <b>hsa-miR-1</b> | TarBase                                                               | Experimentally Observed                         | SSNA1    |
| <b>hsa-miR-1</b> | TarBase                                                               | Experimentally Observed                         | SYNE1    |
| <b>hsa-miR-1</b> | TarBase miRecords                                                     | Experimentally Observed                         | TAC1     |
| <b>hsa-miR-1</b> | Ingenuity Expert<br>Findings TarBase<br>TargetScan Human<br>miRecords | Experimentally Observed                         | TAGLN2   |
| <b>hsa-miR-1</b> | TarBase TargetScan<br>Human miRecords                                 | Experimentally Observed<br>Moderate (predicted) | TDP1     |
| <b>hsa-miR-1</b> | TarBase TargetScan<br>Human miRecords                                 | Experimentally Observed                         | TH1L     |
| <b>hsa-miR-1</b> | TarBase TargetScan                                                    | Experimentally Observed                         | THBS1    |

|                    |                                       |                                                 |                   |
|--------------------|---------------------------------------|-------------------------------------------------|-------------------|
|                    | Human                                 |                                                 |                   |
| <b>hsa-miR-1</b>   | TarBase TargetScan<br>Human miRecords | Experimentally Observed                         | TIMP3             |
| <b>hsa-miR-1</b>   | TarBase TargetScan<br>Human miRecords | Experimentally Observed                         | TMSB10/TMS<br>B4X |
| <b>hsa-miR-1</b>   | TarBase miRecords                     | Experimentally Observed                         | TNS4              |
| <b>hsa-miR-1</b>   | TarBase                               | Experimentally Observed                         | TPM1              |
| <b>hsa-miR-1</b>   | TarBase                               | Experimentally Observed                         | TPM2              |
| <b>hsa-miR-1</b>   | TarBase TargetScan<br>Human           | Experimentally Observed                         | TPM3              |
| <b>hsa-miR-1</b>   | TarBase TargetScan<br>Human miRecords | Experimentally Observed                         | TPM4              |
| <b>hsa-miR-1</b>   | TargetScan Human<br>miRecords         | Experimentally Observed                         | TPPP              |
| <b>hsa-miR-1</b>   | TarBase TargetScan<br>Human miRecords | Experimentally Observed                         | TRAPPC3           |
| <b>hsa-miR-1</b>   | TarBase TargetScan<br>Human miRecords | Experimentally Observed                         | TRIM2             |
| <b>hsa-miR-1</b>   | TarBase TargetScan<br>Human miRecords | Experimentally Observed                         | TSPAN4            |
| <b>hsa-miR-1</b>   | TarBase TargetScan<br>Human miRecords | Experimentally Observed                         | TWF1              |
| <b>hsa-miR-1</b>   | TarBase TargetScan<br>Human miRecords | Experimentally Observed                         | UHMK1             |
| <b>hsa-miR-1</b>   | TarBase                               | Experimentally Observed                         | UHRF1             |
| <b>hsa-miR-1</b>   | TarBase                               | Experimentally Observed                         | UNC93B1           |
| <b>hsa-miR-1</b>   | TarBase TargetScan<br>Human miRecords | Experimentally Observed                         | UST               |
| <b>hsa-miR-1</b>   | TarBase TargetScan<br>Human miRecords | Experimentally Observed                         | UTRN              |
| <b>hsa-miR-1</b>   | TarBase TargetScan<br>Human           | Experimentally Observed<br>Moderate (predicted) | WDFY1             |
| <b>hsa-miR-1</b>   | TarBase                               | Experimentally Observed                         | WDR11             |
| <b>hsa-miR-1</b>   | TarBase TargetScan<br>Human miRecords | Experimentally Observed<br>Moderate (predicted) | XPNPEP3           |
| <b>hsa-miR-1</b>   | TarBase TargetScan<br>Human miRecords | Experimentally Observed                         | XPO6              |
| <b>hsa-miR-1</b>   | TarBase                               | Experimentally Observed                         | YWHAQ             |
| <b>hsa-miR-1</b>   | TarBase TargetScan<br>Human miRecords | Experimentally Observed<br>Moderate (predicted) | ZNF264            |
| <b>hsa-miR-10b</b> | TarBase TargetScan<br>Human miRecords | Experimentally Observed                         | HOXA1             |
| <b>hsa-miR-10b</b> | TarBase TargetScan<br>Human miRecords | Experimentally Observed                         | HOXD10            |
| <b>hsa-miR-10b</b> | miRecords                             | Experimentally Observed                         | KLF4              |
| <b>hsa-miR-</b>    | miRecords                             | Experimentally Observed                         | USF2              |

| <b>10b</b>          |                                                      |                         |         |
|---------------------|------------------------------------------------------|-------------------------|---------|
| <b>hsa-miR-128a</b> | TargetScan Human miRecords                           | Experimentally Observed | ADORA2B |
| <b>hsa-miR-128a</b> | miRecords                                            | Experimentally Observed | AFF1    |
| <b>hsa-miR-128a</b> | TargetScan Human miRecords                           | Experimentally Observed | BMI1    |
| <b>hsa-miR-128a</b> | miRecords                                            | Experimentally Observed | DBI     |
| <b>hsa-miR-128a</b> | TargetScan Human miRecords                           | Experimentally Observed | DCX     |
| <b>hsa-miR-128a</b> | TargetScan Human miRecords                           | Experimentally Observed | E2F3    |
| <b>hsa-miR-128a</b> | miRecords                                            | Experimentally Observed | EIF2C1  |
| <b>hsa-miR-128a</b> | TargetScan Human miRecords                           | Experimentally Observed | LDLR    |
| <b>hsa-miR-128a</b> | TargetScan Human miRecords                           | Experimentally Observed | MLL     |
| <b>hsa-miR-128a</b> | TargetScan Human miRecords                           | Experimentally Observed | NTRK3   |
| <b>hsa-miR-128a</b> | TargetScan Human miRecords                           | Experimentally Observed | RELN    |
| <b>hsa-miR-128a</b> | TargetScan Human miRecords                           | Experimentally Observed | SNAP25  |
| <b>hsa-miR-128a</b> | Ingenuity Expert Findings TargetScan Human           | Experimentally Observed | TGFBR1  |
| <b>hsa-miR-128a</b> | TargetScan Human miRecords                           | Experimentally Observed | TXNIP   |
| <b>hsa-miR-128a</b> | Ingenuity Expert Findings TargetScan Human           | Experimentally Observed | WEE1    |
| <b>hsa-miR-133a</b> | Ingenuity Expert Findings TargetScan Human           | Experimentally Observed | BCL2L2  |
| <b>hsa-miR-133a</b> | Ingenuity Expert Findings TarBase miRecords          | Experimentally Observed | CASP9   |
| <b>hsa-miR-133a</b> | miRecords                                            | Experimentally Observed | CDC42   |
| <b>hsa-miR-133a</b> | Ingenuity Expert Findings TargetScan Human           | Experimentally Observed | CTGF    |
| <b>hsa-miR-133a</b> | Ingenuity Expert Findings TargetScan Human miRecords | Experimentally Observed | FSCN1   |



|                     |                                            |                                              |         |
|---------------------|--------------------------------------------|----------------------------------------------|---------|
| <b>hsa-miR-133a</b> | TarBase miRecords                          | Experimentally Observed                      | HCN2    |
| <b>hsa-miR-133a</b> | TarBase                                    | Experimentally Observed                      | HCN4    |
| <b>hsa-miR-133a</b> | TargetScan Human miRecords                 | Experimentally Observed                      | IGF1R   |
| <b>hsa-miR-133a</b> | TarBase                                    | Experimentally Observed                      | KCNE1   |
| <b>hsa-miR-133a</b> | Ingenuity Expert Findings miRecords        | Experimentally Observed                      | KCNH2   |
| <b>hsa-miR-133a</b> | Ingenuity Expert Findings miRecords        | Experimentally Observed                      | KCNQ1   |
| <b>hsa-miR-133a</b> | Ingenuity Expert Findings miRecords        | Experimentally Observed                      | KLF15   |
| <b>hsa-miR-133a</b> | miRecords                                  | Experimentally Observed                      | KRT7    |
| <b>hsa-miR-133a</b> | Ingenuity Expert Findings TargetScan Human | Experimentally Observed                      | MCL1    |
| <b>hsa-miR-133a</b> | miRecords                                  | Experimentally Observed                      | NFATC4  |
| <b>hsa-miR-133a</b> | miRecords                                  | Experimentally Observed                      | PITX3   |
| <b>hsa-miR-133a</b> | TarBase miRecords                          | Experimentally Observed                      | PKM     |
| <b>hsa-miR-133a</b> | TarBase TargetScan Human miRecords         | Experimentally Observed                      | PTBP2   |
| <b>hsa-miR-133a</b> | miRecords                                  | Experimentally Observed                      | RHOA    |
| <b>hsa-miR-133a</b> | Ingenuity Expert Findings miRecords        | Experimentally Observed                      | RUNX2   |
| <b>hsa-miR-133a</b> | TarBase miRecords                          | Experimentally Observed                      | SRF     |
| <b>hsa-miR-133a</b> | Ingenuity Expert Findings TargetScan Human | Experimentally Observed                      | TAGLN2  |
| <b>hsa-miR-133a</b> | TargetScan Human miRecords                 | Experimentally Observed                      | WHSC2   |
| <b>hsa-miR-135b</b> | miRecords                                  | Experimentally Observed                      | ALOX5AP |
| <b>hsa-miR-135b</b> | TargetScan Human miRecords                 | Experimentally Observed                      | APC     |
| <b>hsa-miR-135b</b> | TargetScan Human miRecords                 | Experimentally Observed                      | JAK2    |
| <b>hsa-miR-135b</b> | Ingenuity Expert Findings TargetScan Human | Experimentally Observed Moderate (predicted) | RUNX2   |

|                     |                                            |                                              |         |
|---------------------|--------------------------------------------|----------------------------------------------|---------|
| <b>hsa-miR-135b</b> | TargetScan Human miRecords                 | Experimentally Observed                      | SMAD5   |
| <b>hsa-miR-138</b>  | miRecords                                  | Experimentally Observed                      | ALDH1A2 |
| <b>hsa-miR-138</b>  | miRecords                                  | Experimentally Observed                      | KRT19   |
| <b>hsa-miR-138</b>  | TargetScan Human miRecords                 | Experimentally Observed                      | RHOC    |
| <b>hsa-miR-138</b>  | TargetScan Human miRecords                 | Experimentally Observed                      | ROCK2   |
| <b>hsa-miR-138</b>  | TarBase                                    | Experimentally Observed                      | SLC45A3 |
| <b>hsa-miR-138</b>  | TarBase TargetScan Human                   | Experimentally Observed Moderate (predicted) | TERT    |
| <b>hsa-miR-138</b>  | miRecords                                  | Experimentally Observed                      | VCAN    |
| <b>hsa-miR-139</b>  | TargetScan Human miRecords                 | Experimentally Observed                      | FOXO1   |
| <b>hsa-miR-140</b>  | miRecords                                  | Experimentally Observed                      | Cxcl12  |
| <b>hsa-miR-140</b>  | Ingenuity Expert Findings TargetScan Human | Experimentally Observed                      | EGR2    |
| <b>hsa-miR-140</b>  | TargetScan Human miRecords                 | Experimentally Observed                      | HDAC4   |
| <b>hsa-miR-140</b>  | TargetScan Human miRecords                 | Experimentally Observed                      | IGFBP5  |
| <b>hsa-miR-140</b>  | miRecords                                  | Experimentally Observed                      | SMAD3   |
| <b>hsa-miR-140</b>  | TargetScan Human miRecords                 | Experimentally Observed                      | VEGFA   |
| <b>hsa-miR-144</b>  | miRecords                                  | Experimentally Observed                      | ENPP6   |
| <b>hsa-miR-146b</b> | miRecords                                  | Experimentally Observed                      | ATOH8   |
| <b>hsa-miR-146b</b> | miRecords                                  | Experimentally Observed                      | BLMH    |
| <b>hsa-miR-146b</b> | miRecords                                  | Experimentally Observed                      | BRCA1   |
| <b>hsa-miR-146b</b> | miRecords                                  | Experimentally Observed                      | CCL8    |
| <b>hsa-miR-146b</b> | miRecords                                  | Experimentally Observed                      | CCNA2   |
| <b>hsa-miR-146b</b> | miRecords                                  | Experimentally Observed                      | CDKN3   |
| <b>hsa-miR-146b</b> | Ingenuity Expert Findings TargetScan       | Experimentally Observed Moderate (predicted) | CFH     |

| Human miRecords     |                            |                                              |         |
|---------------------|----------------------------|----------------------------------------------|---------|
| <b>hsa-miR-146b</b> | miRecords                  | Experimentally Observed                      | COL13A1 |
| <b>hsa-miR-146b</b> | miRecords                  | Experimentally Observed                      | CXCR4   |
| <b>hsa-miR-146b</b> | miRecords                  | Experimentally Observed                      | FADD    |
| <b>hsa-miR-146b</b> | TargetScan Human miRecords | Experimentally Observed                      | IRAK1   |
| <b>hsa-miR-146b</b> | miRecords                  | Experimentally Observed                      | IRAK2   |
| <b>hsa-miR-146b</b> | miRecords                  | Experimentally Observed                      | IRF5    |
| <b>hsa-miR-146b</b> | miRecords                  | Experimentally Observed                      | KIF22   |
| <b>hsa-miR-146b</b> | miRecords                  | Experimentally Observed                      | LTB     |
| <b>hsa-miR-146b</b> | miRecords                  | Experimentally Observed                      | MCM10   |
| <b>hsa-miR-146b</b> | miRecords                  | Experimentally Observed                      | MCPH1   |
| <b>hsa-miR-146b</b> | miRecords                  | Experimentally Observed                      | METTL7A |
| <b>hsa-miR-146b</b> | TargetScan Human miRecords | Experimentally Observed                      | MMP16   |
| <b>hsa-miR-146b</b> | miRecords                  | Experimentally Observed                      | MR1     |
| <b>hsa-miR-146b</b> | TargetScan Human miRecords | Experimentally Observed                      | NFIX    |
| <b>hsa-miR-146b</b> | miRecords                  | Experimentally Observed                      | PA2G4   |
| <b>hsa-miR-146b</b> | TargetScan Human miRecords | Experimentally Observed Moderate (predicted) | PBLD    |
| <b>hsa-miR-146b</b> | miRecords                  | Experimentally Observed                      | PDIK1L  |
| <b>hsa-miR-146b</b> | miRecords                  | Experimentally Observed                      | PEX11G  |
| <b>hsa-miR-146b</b> | miRecords                  | Experimentally Observed                      | PLEKHA4 |
| <b>hsa-miR-146b</b> | miRecords                  | Experimentally Observed                      | POLE2   |
| <b>hsa-miR-146b</b> | miRecords                  | Experimentally Observed                      | PRR15   |
| <b>hsa-miR-146b</b> | miRecords                  | Experimentally Observed                      | RAD54L  |
| <b>hsa-miR-146b</b> | miRecords                  | Experimentally Observed                      | SDCBP2  |

|                     |                                                              |                         |          |
|---------------------|--------------------------------------------------------------|-------------------------|----------|
| <b>hsa-miR-146b</b> | miRecords                                                    | Experimentally Observed | STAT1    |
| <b>hsa-miR-146b</b> | TargetScan Human miRecords                                   | Experimentally Observed | TIMELESS |
| <b>hsa-miR-146b</b> | miRecords                                                    | Experimentally Observed | TMSB15A  |
| <b>hsa-miR-146b</b> | Ingenuity Expert Findings TargetScan Human                   | Experimentally Observed | TRAF6    |
| <b>hsa-miR-146b</b> | miRecords                                                    | Experimentally Observed | TRIM14   |
| <b>hsa-miR-146b</b> | TargetScan Human miRecords                                   | Experimentally Observed | UHRF1    |
| <b>hsa-miR-146b</b> | miRecords                                                    | Experimentally Observed | VWCE     |
| <b>hsa-miR-182</b>  | TargetScan Human miRecords                                   | Experimentally Observed | ADCY6    |
| <b>hsa-miR-182</b>  | TargetScan Human miRecords                                   | Experimentally Observed | IGF1R    |
| <b>hsa-miR-182</b>  | TargetScan Human miRecords                                   | Experimentally Observed | MITF     |
| <b>hsa-miR-182</b>  | TargetScan Human miRecords                                   | Experimentally Observed | RARG     |
| <b>hsa-miR-183</b>  | miRecords                                                    | Experimentally Observed | BTRC     |
| <b>hsa-miR-183</b>  | TargetScan Human miRecords                                   | Experimentally Observed | FOXO1    |
| <b>hsa-miR-183</b>  | Ingenuity Expert Findings TargetScan Human                   | Experimentally Observed | PDCD4    |
| <b>hsa-miR-183</b>  | TargetScan Human miRecords                                   | Experimentally Observed | SRSF2    |
| <b>hsa-miR-196a</b> | Ingenuity Expert Findings miRecords                          | Experimentally Observed | ANXA1    |
| <b>hsa-miR-196a</b> | TarBase TargetScan Human miRecords                           | Experimentally Observed | HOXA7    |
| <b>hsa-miR-196a</b> | Ingenuity Expert Findings TarBase TargetScan Human miRecords | Experimentally Observed | HOXB8    |
| <b>hsa-miR-196a</b> | TarBase TargetScan Human miRecords                           | Experimentally Observed | HOXC8    |
| <b>hsa-miR-196a</b> | TarBase miRecords                                            | Experimentally Observed | HOXD8    |
| <b>hsa-miR-196a</b> | miRecords                                                    | Experimentally Observed | IKBKB    |
| <b>hsa-miR-</b>     | TargetScan Human                                             | Experimentally Observed | KRT5     |

|                     |                                                              |                         |         |
|---------------------|--------------------------------------------------------------|-------------------------|---------|
| <b>196a</b>         | miRecords                                                    | Moderate (predicted)    |         |
| <b>hsa-miR-196a</b> | miRecords                                                    | Experimentally Observed | S100A9  |
| <b>hsa-miR-196a</b> | miRecords                                                    | Experimentally Observed | SPRR2C  |
| <b>hsa-miR-19a</b>  | TargetScan Human miRecords                                   | Experimentally Observed | BCL2L11 |
| <b>hsa-miR-19a</b>  | TargetScan Human miRecords                                   | Experimentally Observed | BMPR2   |
| <b>hsa-miR-19a</b>  | TargetScan Human miRecords                                   | Experimentally Observed | CCND1   |
| <b>hsa-miR-19a</b>  | TargetScan Human miRecords                                   | Experimentally Observed | CTGF    |
| <b>hsa-miR-19a</b>  | TargetScan Human miRecords                                   | Experimentally Observed | ERBB4   |
| <b>hsa-miR-19a</b>  | TargetScan Human miRecords                                   | Experimentally Observed | ESR1    |
| <b>hsa-miR-19a</b>  | TargetScan Human miRecords                                   | Experimentally Observed | HIPK3   |
| <b>hsa-miR-19a</b>  | TargetScan Human miRecords                                   | Experimentally Observed | MYLIP   |
| <b>hsa-miR-19a</b>  | miRecords                                                    | Experimentally Observed | NR4A2   |
| <b>hsa-miR-19a</b>  | Ingenuity Expert Findings TarBase TargetScan Human miRecords | Experimentally Observed | PTEN    |
| <b>hsa-miR-19a</b>  | TargetScan Human miRecords                                   | Experimentally Observed | THBS1   |
| <b>hsa-miR-200a</b> | TargetScan Human miRecords                                   | Experimentally Observed | BAP1    |
| <b>hsa-miR-200a</b> | TarBase TargetScan Human miRecords                           | Experimentally Observed | CLOCK   |
| <b>hsa-miR-200a</b> | Ingenuity Expert Findings TargetScan Human                   | Experimentally Observed | CTBP2   |
| <b>hsa-miR-200a</b> | miRecords                                                    | Experimentally Observed | CTNNB1  |
| <b>hsa-miR-200a</b> | miRecords                                                    | Experimentally Observed | DLX5    |
| <b>hsa-miR-200a</b> | miRecords                                                    | Experimentally Observed | ELMO2   |
| <b>hsa-miR-200a</b> | Ingenuity Expert Findings TargetScan Human                   | Experimentally Observed | EPHA2   |
| <b>hsa-miR-200a</b> | miRecords                                                    | Experimentally Observed | ERBB2IP |

|                     |                                                              |                                              |          |
|---------------------|--------------------------------------------------------------|----------------------------------------------|----------|
| <b>hsa-miR-200a</b> | Ingenuity Expert Findings TargetScan Human                   | Experimentally Observed                      | EXOC5    |
| <b>hsa-miR-200a</b> | TarBase                                                      | Experimentally Observed                      | GEMIN2   |
| <b>hsa-miR-200a</b> | Ingenuity Expert Findings TargetScan Human                   | Experimentally Observed                      | KLF12    |
| <b>hsa-miR-200a</b> | miRecords                                                    | Experimentally Observed                      | KLHL20   |
| <b>hsa-miR-200a</b> | TargetScan Human miRecords                                   | Experimentally Observed                      | MAP2K4   |
| <b>hsa-miR-200a</b> | Ingenuity Expert Findings TargetScan Human                   | Experimentally Observed                      | PPM1E    |
| <b>hsa-miR-200a</b> | Ingenuity Expert Findings TargetScan Human                   | Experimentally Observed                      | PRKACB   |
| <b>hsa-miR-200a</b> | TargetScan Human miRecords                                   | Experimentally Observed                      | PTPRD    |
| <b>hsa-miR-200a</b> | Ingenuity Expert Findings TargetScan Human                   | Experimentally Observed                      | STAT5B   |
| <b>hsa-miR-200a</b> | TargetScan Human miRecords                                   | Experimentally Observed                      | TGFB2    |
| <b>hsa-miR-200a</b> | miRecords                                                    | Experimentally Observed                      | WDR37    |
| <b>hsa-miR-200a</b> | TarBase TargetScan Human miRecords                           | Experimentally Observed                      | ZEB1     |
| <b>hsa-miR-200a</b> | Ingenuity Expert Findings TarBase TargetScan Human miRecords | Experimentally Observed                      | ZEB2     |
| <b>hsa-miR-200a</b> | TargetScan Human miRecords                                   | Experimentally Observed Moderate (predicted) | ZFPM2    |
| <b>hsa-miR-210</b>  | TargetScan Human miRecords                                   | Experimentally Observed Moderate (predicted) | ACVR1B   |
| <b>hsa-miR-210</b>  | miRecords                                                    | Experimentally Observed                      | CASP8AP2 |
| <b>hsa-miR-210</b>  | TarBase TargetScan Human miRecords                           | Experimentally Observed                      | EFNA3    |
| <b>hsa-miR-210</b>  | miRecords                                                    | Experimentally Observed                      | MNT      |
| <b>hsa-miR-210</b>  | miRecords                                                    | Experimentally Observed                      | NPTX1    |
| <b>hsa-miR-210</b>  | Ingenuity Expert Findings TargetScan                         | Experimentally Observed Moderate (predicted) | SDHD     |

|                    | Human                                      |                         |        |
|--------------------|--------------------------------------------|-------------------------|--------|
| <b>hsa-miR-204</b> | miRecords                                  | Experimentally Observed | ARPC1B |
| <b>hsa-miR-204</b> | TargetScan Human miRecords                 | Experimentally Observed | ATP2B1 |
| <b>hsa-miR-204</b> | miRecords                                  | Experimentally Observed | AURKB  |
| <b>hsa-miR-204</b> | miRecords                                  | Experimentally Observed | BMP1   |
| <b>hsa-miR-204</b> | TargetScan Human miRecords                 | Experimentally Observed | CDC25B |
| <b>hsa-miR-204</b> | miRecords                                  | Experimentally Observed | CDH11  |
| <b>hsa-miR-204</b> | miRecords                                  | Experimentally Observed | CTSC   |
| <b>hsa-miR-204</b> | miRecords                                  | Experimentally Observed | EFNB1  |
| <b>hsa-miR-204</b> | miRecords                                  | Experimentally Observed | ERF    |
| <b>hsa-miR-204</b> | TargetScan Human miRecords                 | Experimentally Observed | FBN2   |
| <b>hsa-miR-204</b> | TargetScan Human miRecords                 | Experimentally Observed | HMGA2  |
| <b>hsa-miR-204</b> | miRecords                                  | Experimentally Observed | HOXB7  |
| <b>hsa-miR-204</b> | miRecords                                  | Experimentally Observed | ITGB4  |
| <b>hsa-miR-204</b> | miRecords                                  | Experimentally Observed | MMP3   |
| <b>hsa-miR-204</b> | miRecords                                  | Experimentally Observed | MMP9   |
| <b>hsa-miR-204</b> | TargetScan Human miRecords                 | Experimentally Observed | SHC1   |
| <b>hsa-miR-204</b> | TargetScan Human miRecords                 | Experimentally Observed | SOX4   |
| <b>hsa-miR-204</b> | TargetScan Human miRecords                 | Experimentally Observed | SPARC  |
| <b>hsa-miR-204</b> | miRecords                                  | Experimentally Observed | SPDEF  |
| <b>hsa-miR-204</b> | Ingenuity Expert Findings TargetScan Human | Experimentally Observed | TRPS1  |
| <b>hsa-miR-218</b> | TargetScan Human miRecords                 | Experimentally Observed | COL1A1 |
| <b>hsa-miR-218</b> | miRecords                                  | Experimentally Observed | KCNJ16 |
| <b>hsa-miR-</b>    | TargetScan Human                           | Experimentally Observed | LAMB3  |

|                    |                                                              |                                              |         |
|--------------------|--------------------------------------------------------------|----------------------------------------------|---------|
| <b>218</b>         | miRecords                                                    | Moderate (predicted)                         |         |
| <b>hsa-miR-218</b> | TargetScan Human miRecords                                   | Experimentally Observed                      | ONECUT2 |
| <b>hsa-miR-218</b> | Ingenuity Expert Findings TargetScan Human                   | Experimentally Observed                      | RICTOR  |
| <b>hsa-miR-218</b> | Ingenuity Expert Findings TargetScan Human                   | Experimentally Observed                      | RUNX2   |
| <b>hsa-miR-218</b> | TargetScan Human miRecords                                   | Experimentally Observed                      | SP1     |
| <b>hsa-miR-218</b> | TargetScan Human miRecords                                   | Experimentally Observed                      | VOPP1   |
| <b>hsa-miR-224</b> | TargetScan Human miRecords                                   | Experimentally Observed                      | AP2M1   |
| <b>hsa-miR-224</b> | Ingenuity Expert Findings TarBase TargetScan Human miRecords | Experimentally Observed Moderate (predicted) | API5    |
| <b>hsa-miR-224</b> | miRecords                                                    | Experimentally Observed                      | KLK1    |
| <b>hsa-miR-224</b> | miRecords                                                    | Experimentally Observed                      | KLK10   |
| <b>hsa-miR-296</b> | miRecords                                                    | Experimentally Observed                      | ABCB1   |
| <b>hsa-miR-296</b> | miRecords                                                    | Experimentally Observed                      | BAX     |
| <b>hsa-miR-296</b> | TargetScan Human miRecords                                   | Experimentally Observed Moderate (predicted) | BCL2    |
| <b>hsa-miR-296</b> | TargetScan Human miRecords                                   | Experimentally Observed Moderate (predicted) | CCND1   |
| <b>hsa-miR-296</b> | miRecords                                                    | Experimentally Observed                      | CDKN1B  |
| <b>hsa-miR-296</b> | miRecords                                                    | Experimentally Observed                      | HGS     |
| <b>hsa-miR-296</b> | Ingenuity Expert Findings TargetScan Human                   | Experimentally Observed                      | LYPLA2  |
| <b>hsa-miR-301</b> | Ingenuity Expert Findings TargetScan Human                   | Experimentally Observed                      | ATG2B   |
| <b>hsa-miR-301</b> | TarBase TargetScan Human miRecords                           | Experimentally Observed Moderate (predicted) | CSF1    |
| <b>hsa-miR-301</b> | Ingenuity Expert Findings TargetScan Human                   | Experimentally Observed                      | DICER1  |
| <b>hsa-miR-</b>    | TarBase TargetScan                                           | Experimentally Observed                      | HOXA5   |



|                     |                                       |                         |                   |
|---------------------|---------------------------------------|-------------------------|-------------------|
| <b>301</b>          | Human miRecords                       |                         |                   |
| <b>hsa-miR-301</b>  | TarBase TargetScan<br>Human miRecords | Experimentally Observed | MAFB              |
| <b>hsa-miR-301</b>  | TarBase TargetScan<br>Human miRecords | Experimentally Observed | MEOX2             |
| <b>hsa-miR-301</b>  | TarBase                               | Experimentally Observed | TAC1              |
| <b>hsa-miR-301</b>  | TargetScan Human<br>miRecords         | Experimentally Observed | ZFPM2             |
| <b>hsa-miR-302d</b> | TarBase TargetScan<br>Human miRecords | Experimentally Observed | ADAM9             |
| <b>hsa-miR-302d</b> | TarBase TargetScan<br>Human miRecords | Experimentally Observed | ANKRD13B          |
| <b>hsa-miR-302d</b> | TarBase TargetScan<br>Human miRecords | Experimentally Observed | ANKRD52           |
| <b>hsa-miR-302d</b> | TargetScan Human<br>miRecords         | Experimentally Observed | APP               |
| <b>hsa-miR-302d</b> | TarBase TargetScan<br>Human miRecords | Experimentally Observed | ARHGEF3           |
| <b>hsa-miR-302d</b> | TarBase miRecords                     | Experimentally Observed | BAZ1A             |
| <b>hsa-miR-302d</b> | TarBase miRecords                     | Experimentally Observed | C12orf23          |
| <b>hsa-miR-302d</b> | TarBase miRecords                     | Experimentally Observed | C2orf18           |
| <b>hsa-miR-302d</b> | TarBase miRecords                     | Experimentally Observed | C9orf78           |
| <b>hsa-miR-302d</b> | TargetScan Human<br>miRecords         | Experimentally Observed | CCND1             |
| <b>hsa-miR-302d</b> | TargetScan Human<br>miRecords         | Experimentally Observed | CCND2             |
| <b>hsa-miR-302d</b> | TarBase miRecords                     | Experimentally Observed | CD24              |
| <b>hsa-miR-302d</b> | TargetScan Human<br>miRecords         | Experimentally Observed | CD44              |
| <b>hsa-miR-302d</b> | TarBase miRecords                     | Experimentally Observed | CD83              |
| <b>hsa-miR-302d</b> | TarBase                               | Experimentally Observed | CDK11A/CDK<br>11B |
| <b>hsa-miR-302d</b> | TargetScan Human<br>miRecords         | Experimentally Observed | CDK19             |
| <b>hsa-miR-302d</b> | TarBase                               | Experimentally Observed | CDKN1A            |
| <b>hsa-miR-302d</b> | TarBase miRecords                     | Experimentally Observed | CENPF             |
| <b>hsa-miR-302d</b> | TarBase TargetScan<br>Human miRecords | Experimentally Observed | CFL2              |

|                     |                                    |                                              |          |
|---------------------|------------------------------------|----------------------------------------------|----------|
| <b>hsa-miR-302d</b> | TarBase miRecords                  | Experimentally Observed                      | CMTM4    |
| <b>hsa-miR-302d</b> | TarBase TargetScan Human miRecords | Experimentally Observed                      | CNOT6    |
| <b>hsa-miR-302d</b> | TarBase TargetScan Human miRecords | Experimentally Observed Moderate (predicted) | CYB5R4   |
| <b>hsa-miR-302d</b> | TargetScan Human miRecords         | Experimentally Observed                      | DKK1     |
| <b>hsa-miR-302d</b> | TargetScan Human miRecords         | Experimentally Observed                      | ERBB4    |
| <b>hsa-miR-302d</b> | TargetScan Human miRecords         | Experimentally Observed                      | ESR1     |
| <b>hsa-miR-302d</b> | TarBase TargetScan Human miRecords | Experimentally Observed Moderate (predicted) | FAM13B   |
| <b>hsa-miR-302d</b> | TarBase miRecords                  | Experimentally Observed                      | FITM2    |
| <b>hsa-miR-302d</b> | TarBase TargetScan Human miRecords | Experimentally Observed                      | FYCO1    |
| <b>hsa-miR-302d</b> | TarBase miRecords                  | Experimentally Observed                      | GBAS     |
| <b>hsa-miR-302d</b> | TarBase miRecords                  | Experimentally Observed                      | GBP3     |
| <b>hsa-miR-302d</b> | TarBase miRecords                  | Experimentally Observed                      | GLTP     |
| <b>hsa-miR-302d</b> | TarBase miRecords                  | Experimentally Observed                      | GPSM2    |
| <b>hsa-miR-302d</b> | TarBase miRecords                  | Experimentally Observed                      | HERPUD1  |
| <b>hsa-miR-302d</b> | TarBase miRecords                  | Experimentally Observed                      | HSPA14   |
| <b>hsa-miR-302d</b> | TarBase miRecords                  | Experimentally Observed                      | INSIG2   |
| <b>hsa-miR-302d</b> | TarBase TargetScan Human miRecords | Experimentally Observed                      | KDM1B    |
| <b>hsa-miR-302d</b> | TarBase miRecords                  | Experimentally Observed                      | KIAA1919 |
| <b>hsa-miR-302d</b> | TarBase miRecords                  | Experimentally Observed                      | KIF23    |
| <b>hsa-miR-302d</b> | TargetScan Human miRecords         | Experimentally Observed                      | KLF13    |
| <b>hsa-miR-302d</b> | TarBase miRecords                  | Experimentally Observed                      | KLHL12   |
| <b>hsa-miR-302d</b> | TarBase TargetScan Human miRecords | Experimentally Observed                      | LATS2    |
| <b>hsa-miR-302d</b> | TargetScan Human miRecords         | Experimentally Observed                      | LEFTY1   |
| <b>hsa-miR-</b>     | TargetScan Human                   | Experimentally Observed                      | LEFTY2   |

|                     |                                            |                                              |          |
|---------------------|--------------------------------------------|----------------------------------------------|----------|
| <b>302d</b>         | miRecords                                  |                                              |          |
| <b>hsa-miR-302d</b> | TarBase miRecords                          | Experimentally Observed                      | LMNB1    |
| <b>hsa-miR-302d</b> | TarBase TargetScan Human miRecords         | Experimentally Observed                      | LUC7L2   |
| <b>hsa-miR-302d</b> | TargetScan Human miRecords                 | Experimentally Observed                      | MBNL2    |
| <b>hsa-miR-302d</b> | TarBase miRecords                          | Experimentally Observed                      | MED28    |
| <b>hsa-miR-302d</b> | TarBase TargetScan Human miRecords         | Experimentally Observed                      | MICA     |
| <b>hsa-miR-302d</b> | TarBase TargetScan Human miRecords         | Experimentally Observed                      | MKRN1    |
| <b>hsa-miR-302d</b> | TarBase TargetScan Human miRecords         | Experimentally Observed                      | MYBL1    |
| <b>hsa-miR-302d</b> | TarBase miRecords                          | Experimentally Observed                      | NIN      |
| <b>hsa-miR-302d</b> | TargetScan Human miRecords                 | Experimentally Observed                      | NR4A2    |
| <b>hsa-miR-302d</b> | TarBase miRecords                          | Experimentally Observed                      | NUPL1    |
| <b>hsa-miR-302d</b> | TarBase miRecords                          | Experimentally Observed                      | PACRGL   |
| <b>hsa-miR-302d</b> | TarBase TargetScan Human miRecords         | Experimentally Observed                      | PBK      |
| <b>hsa-miR-302d</b> | TarBase TargetScan Human miRecords         | Experimentally Observed                      | PCGF5    |
| <b>hsa-miR-302d</b> | TarBase TargetScan Human miRecords         | Experimentally Observed                      | PDIK1L   |
| <b>hsa-miR-302d</b> | TarBase miRecords                          | Experimentally Observed                      | PHC2     |
| <b>hsa-miR-302d</b> | TarBase miRecords                          | Experimentally Observed                      | PRC1     |
| <b>hsa-miR-302d</b> | Ingenuity Expert Findings TargetScan Human | Experimentally Observed                      | PRKACB   |
| <b>hsa-miR-302d</b> | TargetScan Human miRecords                 | Experimentally Observed                      | RECK     |
| <b>hsa-miR-302d</b> | TarBase TargetScan Human                   | Experimentally Observed                      | RELA     |
| <b>hsa-miR-302d</b> | TarBase TargetScan Human miRecords         | Experimentally Observed Moderate (predicted) | RNF149   |
| <b>hsa-miR-302d</b> | TarBase miRecords                          | Experimentally Observed                      | RPIA     |
| <b>hsa-miR-302d</b> | TarBase miRecords                          | Experimentally Observed                      | SLC25A23 |
| <b>hsa-miR-302d</b> | TarBase miRecords                          | Experimentally Observed                      | STK4     |

|                       |                                       |                                                 |         |
|-----------------------|---------------------------------------|-------------------------------------------------|---------|
| <b>302d</b>           |                                       |                                                 |         |
| <b>hsa-miR-302d</b>   | TarBase miRecords                     | Experimentally Observed                         | STX11   |
| <b>hsa-miR-302d</b>   | TarBase TargetScan<br>Human miRecords | Experimentally Observed<br>Moderate (predicted) | TBC1D2  |
| <b>hsa-miR-302d</b>   | TarBase miRecords                     | Experimentally Observed                         | TEX30   |
| <b>hsa-miR-302d</b>   | TarBase TargetScan<br>Human miRecords | Experimentally Observed                         | TFAP4   |
| <b>hsa-miR-302d</b>   | TarBase miRecords                     | Experimentally Observed                         | TMEM14A |
| <b>hsa-miR-302d</b>   | TarBase miRecords                     | Experimentally Observed                         | TMEM9B  |
| <b>hsa-miR-302d</b>   | TarBase TargetScan<br>Human miRecords | Experimentally Observed                         | TNFAIP1 |
| <b>hsa-miR-302d</b>   | TargetScan Human<br>miRecords         | Experimentally Observed                         | TP63    |
| <b>hsa-miR-302d</b>   | TargetScan Human<br>miRecords         | Experimentally Observed                         | TRPS1   |
| <b>hsa-miR-302d</b>   | TarBase miRecords                     | Experimentally Observed                         | TTC8    |
| <b>hsa-miR-302d</b>   | TarBase TargetScan<br>Human miRecords | Experimentally Observed                         | TUSC2   |
| <b>hsa-miR-302d</b>   | TarBase miRecords                     | Experimentally Observed                         | UBXN1   |
| <b>hsa-miR-302d</b>   | TarBase miRecords                     | Experimentally Observed                         | USP12   |
| <b>hsa-miR-302d</b>   | TargetScan Human<br>miRecords         | Experimentally Observed                         | VEGFA   |
| <b>hsa-miR-302d</b>   | TarBase miRecords                     | Experimentally Observed                         | VPS26A  |
| <b>hsa-miR-302d</b>   | TarBase miRecords                     | Experimentally Observed                         | ZHX1    |
| <b>hsa-miR-302d</b>   | TarBase miRecords                     | Experimentally Observed                         | ZNF226  |
| <b>hsa-miR-30a-3p</b> | miRecords                             | Experimentally Observed                         | AQP4    |
| <b>hsa-miR-30a-3p</b> | TarBase miRecords                     | Experimentally Observed                         | CDK6    |
| <b>hsa-miR-30a-3p</b> | TarBase miRecords                     | Experimentally Observed                         | CYR61   |
| <b>hsa-miR-30a-3p</b> | miRecords                             | Experimentally Observed                         | FMR1    |
| <b>hsa-miR-30a-3p</b> | TarBase miRecords                     | Experimentally Observed                         | SLC7A6  |
| <b>hsa-miR-30a-3p</b> | TarBase miRecords                     | Experimentally Observed                         | THBS1   |

|                       |                                            |                         |         |
|-----------------------|--------------------------------------------|-------------------------|---------|
| <b>hsa-miR-30a-3p</b> | TarBase miRecords                          | Experimentally Observed | TMEM2   |
| <b>hsa-miR-30a-3p</b> | TarBase miRecords                          | Experimentally Observed | TUBA1A  |
| <b>hsa-miR-30a-3p</b> | TarBase miRecords                          | Experimentally Observed | VEZT    |
| <b>hsa-miR-30a-3p</b> | TarBase miRecords                          | Experimentally Observed | WDR82   |
| <b>hsa-miR-30a-5p</b> | TargetScan Human miRecords                 | Experimentally Observed | ACVR1   |
| <b>hsa-miR-30a-5p</b> | TarBase                                    | Experimentally Observed | ADPGK   |
| <b>hsa-miR-30a-5p</b> | TarBase                                    | Experimentally Observed | ANPEP   |
| <b>hsa-miR-30a-5p</b> | TarBase TargetScan Human                   | Experimentally Observed | AP2A1   |
| <b>hsa-miR-30a-5p</b> | TarBase TargetScan Human                   | Experimentally Observed | ATP2A2  |
| <b>hsa-miR-30a-5p</b> | TarBase                                    | Experimentally Observed | ATRX    |
| <b>hsa-miR-30a-5p</b> | Ingenuity Expert Findings TargetScan Human | Experimentally Observed | BCL6    |
| <b>hsa-miR-30a-5p</b> | TargetScan Human miRecords                 | Experimentally Observed | BECN1   |
| <b>hsa-miR-30a-5p</b> | TarBase                                    | Experimentally Observed | C1orf56 |
| <b>hsa-miR-30a-5p</b> | TarBase TargetScan Human                   | Experimentally Observed | CBFB    |
| <b>hsa-miR-30a-5p</b> | TarBase                                    | Experimentally Observed | CDCP1   |
| <b>hsa-miR-30a-5p</b> | TarBase                                    | Experimentally Observed | CEP72   |
| <b>hsa-miR-30a-5p</b> | TarBase TargetScan Human                   | Experimentally Observed | CHD1    |
| <b>hsa-miR-30a-5p</b> | TarBase TargetScan Human                   | Experimentally Observed | CPNE8   |
| <b>hsa-miR-30a-5p</b> | TarBase TargetScan Human                   | Experimentally Observed | DOCK7   |
| <b>hsa-miR-30a-5p</b> | TarBase TargetScan Human                   | Experimentally Observed | ELMOD2  |
| <b>hsa-miR-30a-5p</b> | TarBase                                    | Experimentally Observed | F2      |
| <b>hsa-miR-30a-5p</b> | TarBase                                    | Experimentally Observed | FRG1    |
| <b>hsa-miR-30a-5p</b> | TarBase                                    | Experimentally Observed | FXR2    |

|                       |                                    |                                              |        |
|-----------------------|------------------------------------|----------------------------------------------|--------|
| <b>hsa-miR-30a-5p</b> | TarBase TargetScan Human           | Experimentally Observed                      | GALNT1 |
| <b>hsa-miR-30a-5p</b> | TarBase TargetScan Human           | Experimentally Observed                      | GALNT7 |
| <b>hsa-miR-30a-5p</b> | TarBase TargetScan Human miRecords | Experimentally Observed                      | GNAI2  |
| <b>hsa-miR-30a-5p</b> | TarBase                            | Experimentally Observed                      | GP2    |
| <b>hsa-miR-30a-5p</b> | TarBase                            | Experimentally Observed                      | HNRNPM |
| <b>hsa-miR-30a-5p</b> | TarBase TargetScan Human           | Experimentally Observed                      | IDH1   |
| <b>hsa-miR-30a-5p</b> | TarBase                            | Experimentally Observed                      | IFRD1  |
| <b>hsa-miR-30a-5p</b> | TarBase                            | Experimentally Observed                      | ITGA2  |
| <b>hsa-miR-30a-5p</b> | TarBase                            | Experimentally Observed                      | JUN    |
| <b>hsa-miR-30a-5p</b> | TarBase                            | Experimentally Observed                      | KDELC2 |
| <b>hsa-miR-30a-5p</b> | miRecords                          | Experimentally Observed                      | KRT7   |
| <b>hsa-miR-30a-5p</b> | TarBase                            | Experimentally Observed                      | KRT85  |
| <b>hsa-miR-30a-5p</b> | TarBase                            | Experimentally Observed                      | LMNB2  |
| <b>hsa-miR-30a-5p</b> | TarBase TargetScan Human           | Experimentally Observed                      | LRR8C  |
| <b>hsa-miR-30a-5p</b> | TarBase                            | Experimentally Observed                      | LTN1   |
| <b>hsa-miR-30a-5p</b> | TarBase TargetScan Human           | Experimentally Observed                      | MAT2A  |
| <b>hsa-miR-30a-5p</b> | TarBase TargetScan Human           | Experimentally Observed                      | MBNL1  |
| <b>hsa-miR-30a-5p</b> | TarBase                            | Experimentally Observed                      | MET    |
| <b>hsa-miR-30a-5p</b> | TarBase                            | Experimentally Observed                      | MLLT1  |
| <b>hsa-miR-30a-5p</b> | TarBase                            | Experimentally Observed                      | MPDU1  |
| <b>hsa-miR-30a-5p</b> | TarBase                            | Experimentally Observed                      | MYO10  |
| <b>hsa-miR-30a-5p</b> | TarBase TargetScan Human           | Experimentally Observed                      | NAPG   |
| <b>hsa-miR-30a-5p</b> | TarBase TargetScan Human           | Experimentally Observed Moderate (predicted) | NCEH1  |
| <b>hsa-miR-30a-5p</b> | TarBase                            | Experimentally Observed                      | NCL    |

|                       |                                            |                         |          |
|-----------------------|--------------------------------------------|-------------------------|----------|
| <b>30a-5p</b>         |                                            |                         |          |
| <b>hsa-miR-30a-5p</b> | TargetScan Human miRecords                 | Experimentally Observed | NEUROD1  |
| <b>hsa-miR-30a-5p</b> | TarBase                                    | Experimentally Observed | NPR3     |
| <b>hsa-miR-30a-5p</b> | TarBase                                    | Experimentally Observed | NT5C3    |
| <b>hsa-miR-30a-5p</b> | TarBase TargetScan Human                   | Experimentally Observed | NT5E     |
| <b>hsa-miR-30a-5p</b> | TarBase                                    | Experimentally Observed | NUCB1    |
| <b>hsa-miR-30a-5p</b> | TarBase TargetScan Human                   | Experimentally Observed | NUFIP2   |
| <b>hsa-miR-30a-5p</b> | TarBase TargetScan Human                   | Experimentally Observed | P4HA2    |
| <b>hsa-miR-30a-5p</b> | TarBase TargetScan Human                   | Experimentally Observed | PAFAH1B2 |
| <b>hsa-miR-30a-5p</b> | TarBase                                    | Experimentally Observed | PEX11B   |
| <b>hsa-miR-30a-5p</b> | TarBase TargetScan Human                   | Experimentally Observed | PGM1     |
| <b>hsa-miR-30a-5p</b> | TarBase                                    | Experimentally Observed | PNP      |
| <b>hsa-miR-30a-5p</b> | TarBase                                    | Experimentally Observed | PPP2R4   |
| <b>hsa-miR-30a-5p</b> | TarBase TargetScan Human                   | Experimentally Observed | PPP3CA   |
| <b>hsa-miR-30a-5p</b> | TarBase TargetScan Human                   | Experimentally Observed | PRPF40A  |
| <b>hsa-miR-30a-5p</b> | TarBase TargetScan Human                   | Experimentally Observed | PTGFRN   |
| <b>hsa-miR-30a-5p</b> | TarBase TargetScan Human                   | Experimentally Observed | PTPRK    |
| <b>hsa-miR-30a-5p</b> | TarBase                                    | Experimentally Observed | PTRH1    |
| <b>hsa-miR-30a-5p</b> | TarBase TargetScan Human                   | Experimentally Observed | RAB27B   |
| <b>hsa-miR-30a-5p</b> | TarBase TargetScan Human                   | Experimentally Observed | RAD23B   |
| <b>hsa-miR-30a-5p</b> | TarBase                                    | Experimentally Observed | RBMS1    |
| <b>hsa-miR-30a-5p</b> | TarBase                                    | Experimentally Observed | RQCD1    |
| <b>hsa-miR-30a-5p</b> | Ingenuity Expert Findings TargetScan Human | Experimentally Observed | RUNX2    |
| <b>hsa-miR-30a-5p</b> | TarBase TargetScan                         | Experimentally Observed | SEC23A   |

|                       |                    |                         |          |
|-----------------------|--------------------|-------------------------|----------|
| <b>30a-5p</b>         | Human              |                         |          |
| <b>hsa-miR-30a-5p</b> | TarBase TargetScan | Experimentally Observed | SEC62    |
| <b>hsa-miR-30a-5p</b> | Human              |                         |          |
| <b>hsa-miR-30a-5p</b> | TarBase            | Experimentally Observed | SLC12A4  |
| <b>hsa-miR-30a-5p</b> | TarBase TargetScan | Experimentally Observed | SLC38A1  |
| <b>hsa-miR-30a-5p</b> | Human              |                         |          |
| <b>hsa-miR-30a-5p</b> | TarBase TargetScan | Experimentally Observed | SLC38A2  |
| <b>hsa-miR-30a-5p</b> | Human              |                         |          |
| <b>hsa-miR-30a-5p</b> | TarBase            | Experimentally Observed | SLC4A10  |
| <b>hsa-miR-30a-5p</b> | TarBase TargetScan | Experimentally Observed | SLC4A7   |
| <b>hsa-miR-30a-5p</b> | Human              |                         |          |
| <b>hsa-miR-30a-5p</b> | TarBase            | Experimentally Observed | SLC7A1   |
| <b>hsa-miR-30a-5p</b> | TarBase TargetScan | Experimentally Observed | SLC7A11  |
| <b>hsa-miR-30a-5p</b> | Human              |                         |          |
| <b>hsa-miR-30a-5p</b> | TarBase            | Experimentally Observed | SLC9A3R2 |
| <b>hsa-miR-30a-5p</b> | TarBase            | Experimentally Observed | STRN     |
| <b>hsa-miR-30a-5p</b> | miRecords          | Experimentally Observed | STX1A    |
| <b>hsa-miR-30a-5p</b> | TarBase            | Experimentally Observed | STX7     |
| <b>hsa-miR-30a-5p</b> | TarBase TargetScan | Experimentally Observed | SYPL1    |
| <b>hsa-miR-30a-5p</b> | Human              |                         |          |
| <b>hsa-miR-30a-5p</b> | miRecords          | Experimentally Observed | SYT4     |
| <b>hsa-miR-30a-5p</b> | TarBase            | Experimentally Observed | THEM4    |
| <b>hsa-miR-30a-5p</b> | TarBase            | Experimentally Observed | TMCO1    |
| <b>hsa-miR-30a-5p</b> | TarBase            | Experimentally Observed | TMED10   |
| <b>hsa-miR-30a-5p</b> | TarBase            | Experimentally Observed | TMED2    |
| <b>hsa-miR-30a-5p</b> | TarBase            | Experimentally Observed | TMED3    |
| <b>hsa-miR-30a-5p</b> | TarBase            | Experimentally Observed | TMED7    |
| <b>hsa-miR-30a-5p</b> | TarBase            | Experimentally Observed | TMEM41B  |
| <b>hsa-miR-30a-5p</b> | TarBase            | Experimentally Observed | TMEM59   |
| <b>hsa-miR-30a-5p</b> | TarBase TargetScan | Experimentally Observed | TMEM87A  |
| <b>hsa-miR-30a-5p</b> | Human              |                         |          |



|                       |                                            |                                              |           |
|-----------------------|--------------------------------------------|----------------------------------------------|-----------|
| <b>hsa-miR-30a-5p</b> | TarBase                                    | Experimentally Observed                      | TNFAIP2   |
| <b>hsa-miR-30a-5p</b> | TarBase TargetScan Human                   | Experimentally Observed Moderate (predicted) | TNFRSF10B |
| <b>hsa-miR-30a-5p</b> | TargetScan Human miRecords                 | Experimentally Observed                      | TNRC6A    |
| <b>hsa-miR-30a-5p</b> | miRecords                                  | Experimentally Observed                      | TP53      |
| <b>hsa-miR-30a-5p</b> | Ingenuity Expert Findings TargetScan Human | Experimentally Observed                      | TRPS1     |
| <b>hsa-miR-30a-5p</b> | TarBase                                    | Experimentally Observed                      | UAP1      |
| <b>hsa-miR-30a-5p</b> | TargetScan Human miRecords                 | Experimentally Observed                      | UBE2I     |
| <b>hsa-miR-30a-5p</b> | TarBase                                    | Experimentally Observed                      | WDR92     |
| <b>hsa-miR-30a-5p</b> | TarBase                                    | Experimentally Observed                      | WNT5A     |
| <b>hsa-miR-31</b>     | miRecords                                  | Experimentally Observed                      | CASR      |
| <b>hsa-miR-31</b>     | miRecords                                  | Experimentally Observed                      | CDKN2A    |
| <b>hsa-miR-31</b>     | TargetScan Human miRecords                 | Experimentally Observed Moderate (predicted) | FOXP3     |
| <b>hsa-miR-31</b>     | TargetScan Human miRecords                 | Experimentally Observed                      | FZD3      |
| <b>hsa-miR-31</b>     | miRecords                                  | Experimentally Observed                      | HIF1A     |
| <b>hsa-miR-31</b>     | miRecords                                  | Experimentally Observed                      | ITGA5     |
| <b>hsa-miR-31</b>     | TargetScan Human miRecords                 | Experimentally Observed                      | LATS2     |
| <b>hsa-miR-31</b>     | miRecords                                  | Experimentally Observed                      | MMP16     |
| <b>hsa-miR-31</b>     | miRecords                                  | Experimentally Observed                      | MPRIP     |
| <b>hsa-miR-31</b>     | miRecords                                  | Experimentally Observed                      | PDGFB     |
| <b>hsa-miR-31</b>     | TargetScan Human miRecords                 | Experimentally Observed                      | PPP2R2A   |
| <b>hsa-miR-31</b>     | TargetScan Human miRecords                 | Experimentally Observed                      | RDX       |
| <b>hsa-miR-31</b>     | miRecords                                  | Experimentally Observed                      | RHOA      |
| <b>hsa-miR-31</b>     | Ingenuity Expert Findings TargetScan Human | Experimentally Observed                      | SATB2     |
| <b>hsa-miR-328</b>    | miRecords                                  | Experimentally Observed                      | ABCG2     |
| <b>hsa-miR-328</b>    | miRecords                                  | Experimentally Observed                      | BACE1     |
| <b>hsa-miR-328</b>    | miRecords                                  | Experimentally Observed                      | CD44      |
| <b>hsa-miR-</b>       | Ingenuity Expert                           | Experimentally Observed                      | BCL6      |

|                    |                                                                       |                                                 |        |
|--------------------|-----------------------------------------------------------------------|-------------------------------------------------|--------|
| <b>339</b>         | Findings TargetScan<br>Human                                          |                                                 |        |
| <b>hsa-miR-339</b> | Ingenuity Expert<br>Findings TargetScan<br>Human                      | Experimentally Observed<br>Moderate (predicted) | GRM3   |
| <b>hsa-miR-339</b> | Ingenuity Expert<br>Findings TargetScan<br>Human                      | Experimentally Observed                         | HOXA11 |
| <b>hsa-miR-33</b>  | Ingenuity Expert<br>Findings TargetScan<br>Human miRecords            | Experimentally Observed                         | ABCA1  |
| <b>hsa-miR-34c</b> | TargetScan Human<br>miRecords                                         | Experimentally Observed<br>Moderate (predicted) | AXIN2  |
| <b>hsa-miR-34c</b> | Ingenuity Expert<br>Findings TargetScan<br>Human miRecords            | Experimentally Observed                         | BCL2   |
| <b>hsa-miR-34c</b> | Ingenuity Expert<br>Findings TarBase<br>TargetScan Human<br>miRecords | Experimentally Observed                         | CCND1  |
| <b>hsa-miR-34c</b> | Ingenuity Expert<br>Findings TargetScan<br>Human                      | Experimentally Observed<br>Moderate (predicted) | CD47   |
| <b>hsa-miR-34c</b> | Ingenuity Expert<br>Findings TarBase<br>TargetScan Human<br>miRecords | Experimentally Observed                         | CDK6   |
| <b>hsa-miR-34c</b> | TarBase TargetScan<br>Human miRecords                                 | Experimentally Observed                         | DLL1   |
| <b>hsa-miR-34c</b> | Ingenuity Expert<br>Findings TarBase<br>TargetScan Human<br>miRecords | Experimentally Observed                         | E2F3   |
| <b>hsa-miR-34c</b> | TargetScan Human<br>miRecords                                         | Experimentally Observed                         | E2F5   |
| <b>hsa-miR-34c</b> | Ingenuity Expert<br>Findings TargetScan<br>Human                      | Experimentally Observed<br>Moderate (predicted) | HDAC1  |
| <b>hsa-miR-34c</b> | TargetScan Human<br>miRecords                                         | Experimentally Observed                         | JAG1   |
| <b>hsa-miR-34c</b> | TargetScan Human<br>miRecords                                         | Experimentally Observed                         | MAP2K1 |
| <b>hsa-miR-34c</b> | Ingenuity Expert<br>Findings TargetScan<br>Human miRecords            | Experimentally Observed                         | MET    |
| <b>hsa-miR-34c</b> | TargetScan Human<br>miRecords                                         | Experimentally Observed<br>Moderate (predicted) | MYB    |

|                      |                                                              |                                              |          |
|----------------------|--------------------------------------------------------------|----------------------------------------------|----------|
| <b>hsa-miR-34c</b>   | miRecords                                                    | Experimentally Observed                      | MYC      |
| <b>hsa-miR-34c</b>   | TargetScan Human miRecords                                   | Experimentally Observed                      | MYCN     |
| <b>hsa-miR-34c</b>   | Ingenuity Expert Findings TarBase TargetScan Human miRecords | Experimentally Observed                      | NOTCH1   |
| <b>hsa-miR-34c</b>   | TargetScan Human miRecords                                   | Experimentally Observed                      | NOTCH2   |
| <b>hsa-miR-34c</b>   | Ingenuity Expert Findings TargetScan Human miRecords         | Experimentally Observed Moderate (predicted) | SIRT1    |
| <b>hsa-miR-34c</b>   | TargetScan Human miRecords                                   | Experimentally Observed Moderate (predicted) | TAGLN    |
| <b>hsa-miR-34c</b>   | miRecords                                                    | Experimentally Observed                      | VEGFA    |
| <b>hsa-miR-34c</b>   | TargetScan Human miRecords                                   | Experimentally Observed Moderate (predicted) | WISP2    |
| <b>hsa-miR-34c</b>   | TargetScan Human miRecords                                   | Experimentally Observed                      | WNT1     |
| <b>hsa-miR-376a*</b> | TarBase miRecords                                            | Experimentally Observed                      | SLC16A1  |
| <b>hsa-miR-376a*</b> | TarBase miRecords                                            | Experimentally Observed                      | SRSF11   |
| <b>hsa-miR-376a*</b> | TarBase miRecords                                            | Experimentally Observed                      | TTK      |
| <b>hsa-miR-487b</b>  | Ingenuity Expert Findings TargetScan Human                   | Experimentally Observed Moderate (predicted) | CDKN2AIP |
| <b>hsa-miR-487b</b>  | Ingenuity Expert Findings TargetScan Human                   | Experimentally Observed                      | MAP2K4   |
| <b>hsa-miR-499</b>   | TargetScan Human miRecords                                   | Experimentally Observed                      | SOX6     |
| <b>hsa-miR-503</b>   | TargetScan Human miRecords                                   | Experimentally Observed                      | CCND1    |
| <b>hsa-miR-504</b>   | miRecords                                                    | Experimentally Observed                      | VEGFA    |
| <b>hsa-miR-7</b>     | TargetScan Human miRecords                                   | Experimentally Observed                      | EGFR     |
| <b>hsa-miR-7</b>     | TarBase miRecords                                            | Experimentally Observed                      | FOS      |
| <b>hsa-miR-7</b>     | TargetScan Human miRecords                                   | Experimentally Observed                      | IRS1     |
| <b>hsa-miR-7</b>     | TargetScan Human miRecords                                   | Experimentally Observed                      | IRS2     |
| <b>hsa-miR-7</b>     | Ingenuity Expert                                             | Experimentally Observed                      | PAK1     |

|                    |                                                            |                                                 |         |
|--------------------|------------------------------------------------------------|-------------------------------------------------|---------|
|                    | Findings TargetScan<br>Human miRecords                     | Moderate (predicted)                            |         |
| <b>hsa-miR-7</b>   | TargetScan Human<br>miRecords                              | Experimentally Observed                         | RAF1    |
| <b>hsa-miR-7</b>   | miRecords                                                  | Experimentally Observed                         | SLC17A7 |
| <b>hsa-miR-7</b>   | TargetScan Human<br>miRecords                              | Experimentally Observed<br>Moderate (predicted) | SLC3A2  |
| <b>hsa-miR-7</b>   | TargetScan Human<br>miRecords                              | Experimentally Observed                         | SNCA    |
| <b>hsa-miR-7</b>   | miRecords                                                  | Experimentally Observed                         | SYNE1   |
| <b>hsa-miR-9</b>   | TarBase TargetScan<br>Human miRecords                      | Experimentally Observed                         | BACE1   |
| <b>hsa-miR-9</b>   | Ingenuity Expert<br>Findings TargetScan<br>Human miRecords | Experimentally Observed                         | CDH1    |
| <b>hsa-miR-9</b>   | miRecords                                                  | Experimentally Observed                         | FGF16   |
| <b>hsa-miR-9</b>   | TargetScan Human<br>miRecords                              | Experimentally Observed                         | FOXG1   |
| <b>hsa-miR-9</b>   | TargetScan Human<br>miRecords                              | Experimentally Observed                         | FOXO1   |
| <b>hsa-miR-9</b>   | miRecords                                                  | Experimentally Observed                         | NFKB1   |
| <b>hsa-miR-9</b>   | miRecords                                                  | Experimentally Observed                         | NTRK3   |
| <b>hsa-miR-9</b>   | TarBase TargetScan<br>Human miRecords                      | Experimentally Observed                         | ONECUT2 |
| <b>hsa-miR-9</b>   | miRecords                                                  | Experimentally Observed                         | PMP22   |
| <b>hsa-miR-9</b>   | Ingenuity Expert<br>Findings TargetScan<br>Human miRecords | Experimentally Observed                         | PRDM1   |
| <b>hsa-miR-9</b>   | TargetScan Human<br>miRecords                              | Experimentally Observed                         | REST    |
| <b>hsa-miR-92b</b> | Ingenuity Expert<br>Findings TargetScan<br>Human miRecords | Experimentally Observed                         | BCL2L11 |
| <b>hsa-miR-92b</b> | TargetScan Human<br>miRecords                              | Experimentally Observed                         | BMPR2   |
| <b>hsa-miR-92b</b> | TargetScan Human<br>miRecords                              | Experimentally Observed                         | CDKN1C  |
| <b>hsa-miR-92b</b> | miRecords                                                  | Experimentally Observed                         | ENPP6   |
| <b>hsa-miR-92b</b> | Ingenuity Expert<br>Findings TargetScan<br>Human           | Experimentally Observed                         | FBXW7   |
| <b>hsa-miR-92b</b> | TargetScan Human<br>miRecords                              | Experimentally Observed                         | HIPK3   |
| <b>hsa-miR-92b</b> | Ingenuity Expert<br>Findings TargetScan<br>Human           | Experimentally Observed                         | IKZF1   |

|                    |                                                      |                         |        |
|--------------------|------------------------------------------------------|-------------------------|--------|
| <b>hsa-miR-92b</b> | TargetScan Human miRecords                           | Experimentally Observed | ITGA5  |
| <b>hsa-miR-92b</b> | TargetScan Human miRecords                           | Experimentally Observed | MAP2K4 |
| <b>hsa-miR-92b</b> | TargetScan Human miRecords                           | Experimentally Observed | MYLIP  |
| <b>hsa-miR-92b</b> | Ingenuity Expert Findings TargetScan Human miRecords | Experimentally Observed | PTEN   |
| <b>hsa-miR-92b</b> | miRecords                                            | Experimentally Observed | VSNL1  |
| <b>hsa-miR-99a</b> | miRecords                                            | Experimentally Observed | FGF16  |
| <b>hsa-miR-99a</b> | Ingenuity Expert Findings TargetScan Human miRecords | Experimentally Observed | FGFR3  |
| <b>hsa-miR-99a</b> | Ingenuity Expert Findings TargetScan Human miRecords | Experimentally Observed | IGF1R  |
| <b>hsa-miR-99a</b> | Ingenuity Expert Findings TargetScan Human miRecords | Experimentally Observed | MTOR   |
| <b>hsa-miR-99a</b> | miRecords                                            | Experimentally Observed | PLK1   |
| <b>hsa-miR-99a</b> | miRecords                                            | Experimentally Observed | RPTOR  |
