# Supplementary material for: MicroRNA expression profile in head and neck cancer: HOX-cluster embedded microRNA-196a and microRNA-10b dysregulation implicated in cell proliferation
Source: PubMed Central journal article supplement (PMC3826519; doi:10.1186/1471-2407-13-533), 2013-11-09
Supplement: 1471-2407-13-533-S2.pdf [file 1471-2407-13-533-S2.pdf]

| Term                                           | Genes                                                                                                                                                                                                                                                                                                                                                                    | FDR      |
|------------------------------------------------|--------------------------------------------------------------------------------------------------------------------------------------------------------------------------------------------------------------------------------------------------------------------------------------------------------------------------------------------------------------------------|----------|
| <b>hsa05200:Pathways in cancer</b>             | E2F3, PDGFB, MMP9, STAT5B, FGF16, MITF, FOXO1, NFKB1, PTEN, TGFB2, CTNNB1, CDC42, WNT1, ACVR1B, FOS, CDKN2A, CASP9, RHOA, MYC, EGFR, CTBP2, RELA, TP53, FADD, CDK6, STK4, CCND1, HIF1A, JUN, VEGFA, WNT5A, FGFR3, CDH1, TPM3, IGF1R, LAMB3, BCL2, AXIN2, TRAF6, APC, MAP2K1, TGFBR1, MET, SMAD3, ITGA2, IGF1, RAF1, FZD3, STAT1, CDKN1A, CDKN1B, HDAC1, BAX, MTOR, IKBKB | 2.53E-15 |
| <b>hsa05220:Chronic myeloid leukemia</b>       | E2F3, CTBP2, MAP2K1, TGFBR1, RELA, STAT5B, TP53, SMAD3, RAF1, CDK6, NFKB1, TGFB2, ACVR1B, CCND1, CDKN1A, CDKN2A, CDKN1B, HDAC1, SHC1, IKBKB, MYC                                                                                                                                                                                                                         | 4.18E-08 |
| <b>hsa05210:Colorectal cancer</b>              | EGFR, MAP2K1, TGFBR1, MET, TP53, SMAD3, RAF1, FZD3, CTNNB1, TGFB2, ACVR1B, FOS, IGF1R, CCND1, CASP9, JUN, BAX, BCL2, AXIN2, MYC, APC                                                                                                                                                                                                                                     | 3.91E-07 |
| <b>hsa05212:Pancreatic cancer</b>              | EGFR, E2F3, MAP2K1, RELA, TGFBR1, TP53, SMAD3, RAF1, CDK6, NFKB1, STAT1, TGFB2, CDC42, ACVR1B, CCND1, CDKN2A, CASP9, VEGFA, IKBKB                                                                                                                                                                                                                                        | 1.33E-06 |
| <b>hsa05215:Prostate cancer</b>                | EGFR, E2F3, MAP2K1, PDGFB, RELA, TP53, FOXO1, IGF1, RAF1, NFKB1, PTEN, CTNNB1, IGF1R, CCND1, CDKN1A, CDKN1B, CASP9, BCL2, MTOR, IKBKB                                                                                                                                                                                                                                    | 7.92E-06 |
| <b>hsa05219:Bladder cancer</b>                 | , FGFR3, MAP2K1, MMP9, TP53, RAF1, CDH1, KN1A, CDKN2A, VEGFA, THBS1, MYC                                                                                                                                                                                                                                                                                                 | 1.77E-05 |
| <b>hsa05218:Melanoma</b>                       | EGFR, E2F3, PDGFB, MAP2K1, FGF16, MET, MITF, TP53, IGF1, RAF1, CDK6, CDH1, PTEN, IGF1R, CCND1, CDKN1A, CDKN2A                                                                                                                                                                                                                                                            | 5.75E-05 |
| <b>hsa05214:Glioma</b>                         | EGFR, E2F3, PDGFB, MAP2K1, TP53, IGF1, RAF1, CDK6, PTEN, IGF1R, CCND1, CDKN1A, CDKN2A, SHC1, MTOR, CALM1                                                                                                                                                                                                                                                                 | 6.97E-05 |
| <b>hsa04722:Neurotrophin signaling pathway</b> | IRAK2, IRAK1, IRS2, MAP2K1, RELA, TP53, RAF1, NFKB1, IRS1, NTRK3, CDC42, BDNF, JUN, BAX, BCL2, YWHAQ, RHOA, SHC1, TRAF6, IKBKB, CALM1                                                                                                                                                                                                                                    | 4.46E-04 |
| <b>hsa04110:Cell cycle</b>                     | E2F3, E2F5, TP53, SMAD3, TTK, CDK6, WEE1, TGFB2, CDC25B, CDKN1C, CCND1, CDKN1A, CDKN2A, CDKN1B, HDAC1, CCND2, PLK1, YWHAQ, MYC, CCNA2                                                                                                                                                                                                                                    | 0.002    |
| <b>hsa04510:Focal adhesion</b>                 | PDGFB, ITGB4, PTEN, CTNNB1, IGF1R, CDC42, LAMB3, BCL2, RHOA, SHC1, PAK1, THBS1, EGFR, MAP2K1, ROCK2, MET, ITGA2, IGF1, RAF1, CCND1, CCND2, ITGA5, JUN, VEGFA, RELN,                                                                                                                                                                                                      | 0.002    |

|                                            |                                                                                                                                                                                              |       |
|--------------------------------------------|----------------------------------------------------------------------------------------------------------------------------------------------------------------------------------------------|-------|
|                                            | COL1A1                                                                                                                                                                                       |       |
| <b>hsa05213:Endometrial cancer</b>         | EGFR, CCND1, CASP9, MAP2K1, TP53, RAF1, CDH1, AXIN2, MYC, PTEN, CTNNB1, APC                                                                                                                  | 0.014 |
| <b>hsa05222:Small cell lung cancer</b>     | E2F3, RELA, TP53, ITGA2, CDK6, NFKB1, PTEN, CCND1, LAMB3, CDKN1B, CASP9, BCL2, TRAF6, IKBKB, MYC                                                                                             | 0.018 |
| <b>hsa04350:TGF-beta signaling pathway</b> | E2F5, ROCK2, TGFBR1, SMAD5, BMPR2, SMAD3, LEFTY1, TGFB2, ACVR1B, SP1, LEFTY2, RHOA, THBS1, MYC, ACVR1                                                                                        | 0.027 |
| <b>hsa04310:Wnt signaling pathway</b>      | WNT5A, CTBP2, ROCK2, BTRC, TP53, SMAD3, FZD3, CTNNB1, WNT1, CCND1, DKK1, CCND2, JUN, RHOA, NFATC4, PRKACB, PPP3CA, AXIN2, MYC, APC                                                           | 0.037 |
| <b>hsa04115:p53 signaling pathway</b>      | TP53, IGF1, CDK6, PTEN, CCND1, CDKN1A, TNFRSF10B, CDKN2A, CASP9, SERPINB5, CCND2, BAX, THBS1                                                                                                 | 0.041 |
| <b>hsa04010:MAPK signaling pathway</b>     | FGFR3, PDGFB, FGF16, HSPA1A, NFKB1, SRF, TGFB2, FOS, ACVR1B, CDC42, BDNF, NFATC4, PRKACB, PAK1, PPP3CA, TRAF6, MYC, EGFR, MAP2K1, RELA, TGFBR1, MAP2K4, TP53, RAF1, STK4, CDC25B, JUN, IKBKB | 0.047 |
