# Supplementary material for: MicroRNA expression profile in head and neck cancer: HOX-cluster embedded microRNA-196a and microRNA-10b dysregulation implicated in cell proliferation
Source: PubMed Central journal article supplement (PMC3826519; doi:10.1186/1471-2407-13-533), 2013-11-09
Supplement: 1471-2407-13-533-S5.pdf [file 1471-2407-13-533-S5.pdf]

| <b>Gene Symbol</b> | <b>FoldChange</b> | <b>FoldChange Description</b>         | <b>Gene Symbol</b> | <b>FoldChange</b> | <b>FoldChange Description</b>       |
|--------------------|-------------------|---------------------------------------|--------------------|-------------------|-------------------------------------|
| <b>AARS</b>        | 1.53              | Keratinocyte miR-196a down vs Control | <b>ACVR1B</b>      | 1.53              | Keratinocyte miR-196a up vs Control |
| <b>ABCA11</b>      | 1.56              | Keratinocyte miR-196a down vs Control | <b>ADAM29</b>      | 1.56              | Keratinocyte miR-196a up vs Control |
| <b>ABCA7</b>       | 1.53              | Keratinocyte miR-196a down vs Control | <b>ADAMTS8</b>     | 1.56              | Keratinocyte miR-196a up vs Control |
| <b>ACTC</b>        | 1.53              | Keratinocyte miR-196a down vs Control | <b>ADCY1</b>       | 1.56              | Keratinocyte miR-196a up vs Control |
| <b>ACTR5</b>       | 1.53              | Keratinocyte miR-196a down vs Control | <b>ADRA2A</b>      | 1.65              | Keratinocyte miR-196a up vs Control |
| <b>ADAMTS12</b>    | 1.53              | Keratinocyte miR-196a down vs Control | <b>AGXT2L1</b>     | 1.65              | Keratinocyte miR-196a up vs Control |
| <b>AGTRAP</b>      | 1.65              | Keratinocyte miR-196a down vs Control | <b>AMZ1</b>        | 1.56              | Keratinocyte miR-196a up vs Control |
| <b>AKT1</b>        | 1.53              | Keratinocyte miR-196a down vs Control | <b>ANAPC5</b>      | 1.53              | Keratinocyte miR-196a up vs Control |
| <b>ALDOAP2</b>     | 1.53              | Keratinocyte miR-196a down vs Control | <b>ANKRD43</b>     | 1.65              | Keratinocyte miR-196a up vs Control |
| <b>AOF1</b>        | 1.53              | Keratinocyte miR-196a down vs Control | <b>ANKRD55</b>     | 1.56              | Keratinocyte miR-196a up vs Control |
| <b>APOB48R</b>     | 1.56              | Keratinocyte miR-196a down vs Control | <b>ANKS1B</b>      | 1.56              | Keratinocyte miR-196a up vs Control |
| <b>ARAF</b>        | 1.53              | Keratinocyte miR-196a down vs Control | <b>ANXA2</b>       | 1.53              | Keratinocyte miR-196a up vs Control |
| <b>ARF5</b>        | 1.53              | Keratinocyte miR-196a down vs Control | <b>AQP6</b>        | 1.56              | Keratinocyte miR-196a up vs Control |

|                |      |                                       |                |      |                                     |
|----------------|------|---------------------------------------|----------------|------|-------------------------------------|
|                |      | down vs Control                       |                |      | Control                             |
| <b>ARL5B</b>   | 1.56 | Keratinocyte miR-196a down vs Control | <b>ARL17P1</b> | 1.53 | Keratinocyte miR-196a up vs Control |
| <b>ARPC1B</b>  | 1.53 | Keratinocyte miR-196a down vs Control | <b>ARSE</b>    | 1.56 | Keratinocyte miR-196a up vs Control |
| <b>ASB8</b>    | 1.53 | Keratinocyte miR-196a down vs Control | <b>AS3MT</b>   | 1.65 | Keratinocyte miR-196a up vs Control |
| <b>ASS</b>     | 1.53 | Keratinocyte miR-196a down vs Control | <b>ASAH3</b>   | 1.56 | Keratinocyte miR-196a up vs Control |
| <b>ASTE1</b>   | 1.56 | Keratinocyte miR-196a down vs Control | <b>AT_W_5</b>  | 1.53 | Keratinocyte miR-196a up vs Control |
| <b>ATAD3B</b>  | 1.53 | Keratinocyte miR-196a down vs Control | <b>ATXN7L2</b> | 1.56 | Keratinocyte miR-196a up vs Control |
| <b>B4GALT7</b> | 1.56 | Keratinocyte miR-196a down vs Control | <b>B3GNT7</b>  | 1.65 | Keratinocyte miR-196a up vs Control |
| <b>BAP1</b>    | 1.65 | Keratinocyte miR-196a down vs Control | <b>BATF</b>    | 1.65 | Keratinocyte miR-196a up vs Control |
| <b>BARX1</b>   | 1.53 | Keratinocyte miR-196a down vs Control | <b>BHLHB5</b>  | 1.56 | Keratinocyte miR-196a up vs Control |
| <b>BAT5</b>    | 1.53 | Keratinocyte miR-196a down vs Control | <b>BOC</b>     | 1.53 | Keratinocyte miR-196a up vs Control |
| <b>BCL2L1</b>  | 1.53 | Keratinocyte miR-196a down vs Control | <b>BTK</b>     | 1.65 | Keratinocyte miR-196a up vs Control |
| <b>BCORL2</b>  | 1.65 | Keratinocyte miR-196a down vs Control | <b>BYSL</b>    | 1.65 | Keratinocyte miR-196a up vs Control |
| <b>BCR</b>     | 1.53 | Keratinocyte miR-196a down vs Control | <b>BZRAP1</b>  | 1.56 | Keratinocyte miR-196a up vs Control |

|               |      |                                       |                 |      |                                     |
|---------------|------|---------------------------------------|-----------------|------|-------------------------------------|
| <b>BIRC7</b>  | 1.53 | Keratinocyte miR-196a down vs Control | <b>C1D</b>      | 1.55 | Keratinocyte miR-196a up vs Control |
| <b>BLCAP</b>  | 1.53 | Keratinocyte miR-196a down vs Control | <b>C1QA</b>     | 1.53 | Keratinocyte miR-196a up vs Control |
| <b>BUD31</b>  | 1.53 | Keratinocyte miR-196a down vs Control | <b>CACNA2D1</b> | 1.53 | Keratinocyte miR-196a up vs Control |
| <b>CA5B</b>   | 1.65 | Keratinocyte miR-196a down vs Control | <b>CALML6</b>   | 1.56 | Keratinocyte miR-196a up vs Control |
| <b>CACNG4</b> | 1.65 | Keratinocyte miR-196a down vs Control | <b>CCDC67</b>   | 1.56 | Keratinocyte miR-196a up vs Control |
| <b>CAMK1</b>  | 1.65 | Keratinocyte miR-196a down vs Control | <b>CD160</b>    | 1.56 | Keratinocyte miR-196a up vs Control |
| <b>CARS</b>   | 1.53 | Keratinocyte miR-196a down vs Control | <b>CD8A</b>     | 1.53 | Keratinocyte miR-196a up vs Control |
| <b>CASP6</b>  | 1.56 | Keratinocyte miR-196a down vs Control | <b>CDH20</b>    | 1.53 | Keratinocyte miR-196a up vs Control |
| <b>CCDC32</b> | 1.53 | Keratinocyte miR-196a down vs Control | <b>CFC1</b>     | 1.56 | Keratinocyte miR-196a up vs Control |
| <b>CCDC49</b> | 1.53 | Keratinocyte miR-196a down vs Control | <b>CH25H</b>    | 1.53 | Keratinocyte miR-196a up vs Control |
| <b>CCDC66</b> | 1.53 | Keratinocyte miR-196a down vs Control | <b>CHRNA4</b>   | 1.56 | Keratinocyte miR-196a up vs Control |
| <b>CCR6</b>   | 1.56 | Keratinocyte miR-196a down vs Control | <b>CHRNB4</b>   | 1.53 | Keratinocyte miR-196a up vs Control |
| <b>CCS</b>    | 1.65 | Keratinocyte miR-196a down vs Control | <b>CIB3</b>     | 1.53 | Keratinocyte miR-196a up vs Control |
| <b>CD14</b>   | 1.56 | Keratinocyte miR-196a down vs Control | <b>CLDN11</b>   | 1.56 | Keratinocyte miR-196a up vs Control |

|                 |      |                                       |               |      |                                     |
|-----------------|------|---------------------------------------|---------------|------|-------------------------------------|
|                 |      | down vs Control                       |               |      | Control                             |
| <b>CD2BP2</b>   | 1.56 | Keratinocyte miR-196a down vs Control | <b>CLEC4C</b> | 1.53 | Keratinocyte miR-196a up vs Control |
| <b>CD68</b>     | 1.53 | Keratinocyte miR-196a down vs Control | <b>CLEC4G</b> | 1.53 | Keratinocyte miR-196a up vs Control |
| <b>CDC23</b>    | 1.53 | Keratinocyte miR-196a down vs Control | <b>CML2</b>   | 1.56 | Keratinocyte miR-196a up vs Control |
| <b>CDC42SE1</b> | 1.56 | Keratinocyte miR-196a down vs Control | <b>COL4A3</b> | 1.56 | Keratinocyte miR-196a up vs Control |
| <b>CDH7</b>     | 1.53 | Keratinocyte miR-196a down vs Control | <b>COX4I2</b> | 1.56 | Keratinocyte miR-196a up vs Control |
| <b>CDK10</b>    | 1.53 | Keratinocyte miR-196a down vs Control | <b>COX6A1</b> | 1.65 | Keratinocyte miR-196a up vs Control |
| <b>CDK5RAP2</b> | 1.53 | Keratinocyte miR-196a down vs Control | <b>CPN2</b>   | 1.56 | Keratinocyte miR-196a up vs Control |
| <b>CDY2A</b>    | 1.53 | Keratinocyte miR-196a down vs Control | <b>CRHR1</b>  | 1.56 | Keratinocyte miR-196a up vs Control |
| <b>CEECAM1</b>  | 1.53 | Keratinocyte miR-196a down vs Control | <b>CYP2A7</b> | 1.56 | Keratinocyte miR-196a up vs Control |
| <b>CENTB1</b>   | 1.53 | Keratinocyte miR-196a down vs Control | <b>CYP2F1</b> | 1.56 | Keratinocyte miR-196a up vs Control |
| <b>CHFR</b>     | 1.53 | Keratinocyte miR-196a down vs Control | <b>DCAL1</b>  | 1.53 | Keratinocyte miR-196a up vs Control |
| <b>CHRNA6</b>   | 1.53 | Keratinocyte miR-196a down vs Control | <b>DES</b>    | 1.53 | Keratinocyte miR-196a up vs Control |
| <b>CLCN7</b>    | 1.56 | Keratinocyte miR-196a down vs Control | <b>DGCR8</b>  | 1.56 | Keratinocyte miR-196a up vs Control |

|                |      |                                       |               |      |                                     |
|----------------|------|---------------------------------------|---------------|------|-------------------------------------|
| <b>CLDN4</b>   | 1.53 | Keratinocyte miR-196a down vs Control | <b>DLSTP</b>  | 1.56 | Keratinocyte miR-196a up vs Control |
| <b>COL4A5</b>  | 1.56 | Keratinocyte miR-196a down vs Control | <b>DPM3</b>   | 1.65 | Keratinocyte miR-196a up vs Control |
| <b>COQ4</b>    | 1.53 | Keratinocyte miR-196a down vs Control | <b>DRD3</b>   | 1.56 | Keratinocyte miR-196a up vs Control |
| <b>CORO1B</b>  | 1.53 | Keratinocyte miR-196a down vs Control | <b>DSPG3</b>  | 1.56 | Keratinocyte miR-196a up vs Control |
| <b>CPSF1</b>   | 1.53 | Keratinocyte miR-196a down vs Control | <b>ECM2</b>   | 1.65 | Keratinocyte miR-196a up vs Control |
| <b>CPSF3L</b>  | 1.53 | Keratinocyte miR-196a down vs Control | <b>EDNRB</b>  | 1.53 | Keratinocyte miR-196a up vs Control |
| <b>CSPP1</b>   | 1.53 | Keratinocyte miR-196a down vs Control | <b>EFCAB3</b> | 1.65 | Keratinocyte miR-196a up vs Control |
| <b>CTNNA3</b>  | 1.56 | Keratinocyte miR-196a down vs Control | <b>EFNA5</b>  | 1.56 | Keratinocyte miR-196a up vs Control |
| <b>DCC</b>     | 1.53 | Keratinocyte miR-196a down vs Control | <b>EGR2</b>   | 1.53 | Keratinocyte miR-196a up vs Control |
| <b>DDX56</b>   | 1.53 | Keratinocyte miR-196a down vs Control | <b>EHD2</b>   | 1.65 | Keratinocyte miR-196a up vs Control |
| <b>DEFA1</b>   | 1.65 | Keratinocyte miR-196a down vs Control | <b>ELK4</b>   | 1.53 | Keratinocyte miR-196a up vs Control |
| <b>DEFB127</b> | 1.68 | Keratinocyte miR-196a down vs Control | <b>EPHA6</b>  | 1.65 | Keratinocyte miR-196a up vs Control |
| <b>DHPS</b>    | 1.53 | Keratinocyte miR-196a down vs Control | <b>ERAS</b>   | 1.53 | Keratinocyte miR-196a up vs Control |
| <b>DNAJB14</b> | 1.53 | Keratinocyte miR-196a down vs Control | <b>ERVWE1</b> | 1.56 | Keratinocyte miR-196a up vs Control |

|               |      |                                       |                |      |                                     |
|---------------|------|---------------------------------------|----------------|------|-------------------------------------|
|               |      | down vs Control                       |                |      | Control                             |
| <b>DPF2</b>   | 1.53 | Keratinocyte miR-196a down vs Control | <b>FABP4</b>   | 1.56 | Keratinocyte miR-196a up vs Control |
| <b>DPP9</b>   | 1.56 | Keratinocyte miR-196a down vs Control | <b>FAM113A</b> | 1.56 | Keratinocyte miR-196a up vs Control |
| <b>DRG1</b>   | 1.65 | Keratinocyte miR-196a down vs Control | <b>FAM77D</b>  | 1.56 | Keratinocyte miR-196a up vs Control |
| <b>DSP</b>    | 1.56 | Keratinocyte miR-196a down vs Control | <b>FAM81B</b>  | 1.56 | Keratinocyte miR-196a up vs Control |
| <b>DTX2</b>   | 1.53 | Keratinocyte miR-196a down vs Control | <b>FAM92B</b>  | 1.65 | Keratinocyte miR-196a up vs Control |
| <b>DUSP11</b> | 1.53 | Keratinocyte miR-196a down vs Control | <b>FANCB</b>   | 1.65 | Keratinocyte miR-196a up vs Control |
| <b>ECH1</b>   | 1.53 | Keratinocyte miR-196a down vs Control | <b>FGA</b>     | 1.65 | Keratinocyte miR-196a up vs Control |
| <b>EDC4</b>   | 1.56 | Keratinocyte miR-196a down vs Control | <b>FKBP2</b>   | 1.56 | Keratinocyte miR-196a up vs Control |
| <b>EDG4</b>   | 1.53 | Keratinocyte miR-196a down vs Control | <b>FLCN</b>    | 1.56 | Keratinocyte miR-196a up vs Control |
| <b>EFHB</b>   | 1.53 | Keratinocyte miR-196a down vs Control | <b>FLRT1</b>   | 1.56 | Keratinocyte miR-196a up vs Control |
| <b>EIF1</b>   | 1.56 | Keratinocyte miR-196a down vs Control | <b>G36726</b>  | 1.65 | Keratinocyte miR-196a up vs Control |
| <b>EIF2B5</b> | 1.53 | Keratinocyte miR-196a down vs Control | <b>GABRR2</b>  | 1.56 | Keratinocyte miR-196a up vs Control |
| <b>ELF3</b>   | 1.53 | Keratinocyte miR-196a down vs Control | <b>GAD1</b>    | 1.65 | Keratinocyte miR-196a up vs Control |

|                |      |                                       |                |      |                                     |
|----------------|------|---------------------------------------|----------------|------|-------------------------------------|
| <b>ELOF1</b>   | 1.53 | Keratinocyte miR-196a down vs Control | <b>GAGE3</b>   | 1.53 | Keratinocyte miR-196a up vs Control |
| <b>ELOVL5</b>  | 1.53 | Keratinocyte miR-196a down vs Control | <b>GALNTL1</b> | 1.56 | Keratinocyte miR-196a up vs Control |
| <b>EML3</b>    | 1.53 | Keratinocyte miR-196a down vs Control | <b>GALNTL5</b> | 1.56 | Keratinocyte miR-196a up vs Control |
| <b>EPB41</b>   | 1.53 | Keratinocyte miR-196a down vs Control | <b>GCET2</b>   | 1.65 | Keratinocyte miR-196a up vs Control |
| <b>EPHA7</b>   | 1.65 | Keratinocyte miR-196a down vs Control | <b>GCM1</b>    | 1.56 | Keratinocyte miR-196a up vs Control |
| <b>ESX1</b>    | 1.53 | Keratinocyte miR-196a down vs Control | <b>GMIP</b>    | 1.53 | Keratinocyte miR-196a up vs Control |
| <b>EVC2</b>    | 1.53 | Keratinocyte miR-196a down vs Control | <b>GPLY</b>    | 1.53 | Keratinocyte miR-196a up vs Control |
| <b>EXOSC5</b>  | 1.65 | Keratinocyte miR-196a down vs Control | <b>GPBAR1</b>  | 1.56 | Keratinocyte miR-196a up vs Control |
| <b>EXPH5</b>   | 1.53 | Keratinocyte miR-196a down vs Control | <b>GPHA2</b>   | 1.56 | Keratinocyte miR-196a up vs Control |
| <b>FAH</b>     | 1.53 | Keratinocyte miR-196a down vs Control | <b>GPHB5</b>   | 1.56 | Keratinocyte miR-196a up vs Control |
| <b>FAM105B</b> | 1.65 | Keratinocyte miR-196a down vs Control | <b>GPR144</b>  | 1.56 | Keratinocyte miR-196a up vs Control |
| <b>FAM107A</b> | 1.56 | Keratinocyte miR-196a down vs Control | <b>GPR31</b>   | 1.56 | Keratinocyte miR-196a up vs Control |
| <b>FAM12A</b>  | 1.53 | Keratinocyte miR-196a down vs Control | <b>GPR75</b>   | 1.65 | Keratinocyte miR-196a up vs Control |
| <b>FAM73A</b>  | 1.53 | Keratinocyte miR-196a down vs Control | <b>GPR85</b>   | 1.56 | Keratinocyte miR-196a up vs Control |

|               |      |                                       |                  |      |                                     |
|---------------|------|---------------------------------------|------------------|------|-------------------------------------|
|               |      | down vs Control                       |                  |      | Control                             |
| <b>FBP2</b>   | 1.56 | Keratinocyte miR-196a down vs Control | <b>GRIK2</b>     | 1.65 | Keratinocyte miR-196a up vs Control |
| <b>FBXO6</b>  | 1.53 | Keratinocyte miR-196a down vs Control | <b>GRIP2</b>     | 1.56 | Keratinocyte miR-196a up vs Control |
| <b>FCGR3A</b> | 1.65 | Keratinocyte miR-196a down vs Control | <b>GUCA2B</b>    | 1.53 | Keratinocyte miR-196a up vs Control |
| <b>FGF22</b>  | 1.65 | Keratinocyte miR-196a down vs Control | <b>GZMM</b>      | 1.56 | Keratinocyte miR-196a up vs Control |
| <b>FKBP8</b>  | 1.53 | Keratinocyte miR-196a down vs Control | <b>HAMP</b>      | 1.65 | Keratinocyte miR-196a up vs Control |
| <b>FLNA</b>   | 1.53 | Keratinocyte miR-196a down vs Control | <b>HAVCR1</b>    | 1.65 | Keratinocyte miR-196a up vs Control |
| <b>FMNL3</b>  | 1.56 | Keratinocyte miR-196a down vs Control | <b>HIST1H2AK</b> | 1.65 | Keratinocyte miR-196a up vs Control |
| <b>FSCN1</b>  | 1.53 | Keratinocyte miR-196a down vs Control | <b>HIST1H4K</b>  | 1.56 | Keratinocyte miR-196a up vs Control |
| <b>FTSJ2</b>  | 1.53 | Keratinocyte miR-196a down vs Control | <b>HIVEP3</b>    | 1.56 | Keratinocyte miR-196a up vs Control |
| <b>FUT4</b>   | 1.56 | Keratinocyte miR-196a down vs Control | <b>HLA-DRB3</b>  | 1.53 | Keratinocyte miR-196a up vs Control |
| <b>FXR2</b>   | 1.53 | Keratinocyte miR-196a down vs Control | <b>HMCN2</b>     | 1.53 | Keratinocyte miR-196a up vs Control |
| <b>G6PD</b>   | 1.53 | Keratinocyte miR-196a down vs Control | <b>HMP19</b>     | 1.53 | Keratinocyte miR-196a up vs Control |
| <b>GBA2</b>   | 1.53 | Keratinocyte miR-196a down vs Control | <b>HOXA7</b>     | 1.65 | Keratinocyte miR-196a up vs Control |



|                |      |                                       |                 |      |                                     |
|----------------|------|---------------------------------------|-----------------|------|-------------------------------------|
| <b>GBL</b>     | 1.65 | Keratinocyte miR-196a down vs Control | <b>IGSF2</b>    | 1.56 | Keratinocyte miR-196a up vs Control |
| <b>GC</b>      | 1.53 | Keratinocyte miR-196a down vs Control | <b>IGSF4D</b>   | 1.53 | Keratinocyte miR-196a up vs Control |
| <b>GDDR</b>    | 1.56 | Keratinocyte miR-196a down vs Control | <b>IL17A</b>    | 1.53 | Keratinocyte miR-196a up vs Control |
| <b>GIPC1</b>   | 1.53 | Keratinocyte miR-196a down vs Control | <b>IL28A</b>    | 1.56 | Keratinocyte miR-196a up vs Control |
| <b>GJB1</b>    | 1.56 | Keratinocyte miR-196a down vs Control | <b>INSRR</b>    | 1.53 | Keratinocyte miR-196a up vs Control |
| <b>GJB5</b>    | 1.53 | Keratinocyte miR-196a down vs Control | <b>ITGB1BP2</b> | 1.56 | Keratinocyte miR-196a up vs Control |
| <b>GLT1D1</b>  | 1.56 | Keratinocyte miR-196a down vs Control | <b>J03651</b>   | 1.53 | Keratinocyte miR-196a up vs Control |
| <b>GNA15</b>   | 1.53 | Keratinocyte miR-196a down vs Control | <b>KCNC3</b>    | 1.56 | Keratinocyte miR-196a up vs Control |
| <b>GNAI2</b>   | 1.53 | Keratinocyte miR-196a down vs Control | <b>KCNJ1</b>    | 1.53 | Keratinocyte miR-196a up vs Control |
| <b>GNB2</b>    | 1.53 | Keratinocyte miR-196a down vs Control | <b>KCNK7</b>    | 1.56 | Keratinocyte miR-196a up vs Control |
| <b>GNB2L1</b>  | 1.53 | Keratinocyte miR-196a down vs Control | <b>KEL</b>      | 1.56 | Keratinocyte miR-196a up vs Control |
| <b>GORASP1</b> | 1.53 | Keratinocyte miR-196a down vs Control | <b>KHSRP</b>    | 1.53 | Keratinocyte miR-196a up vs Control |
| <b>GOT1L1</b>  | 1.53 | Keratinocyte miR-196a down vs Control | <b>KIAA1456</b> | 1.56 | Keratinocyte miR-196a up vs Control |
| <b>GPAA1</b>   | 1.53 | Keratinocyte miR-196a down vs Control | <b>KIAA1661</b> | 1.56 | Keratinocyte miR-196a up vs Control |

|                 |      |                                       |                |      |                                     |
|-----------------|------|---------------------------------------|----------------|------|-------------------------------------|
|                 |      | down vs Control                       |                |      | Control                             |
| <b>GRAMD1A</b>  | 1.56 | Keratinocyte miR-196a down vs Control | <b>KIR2DS2</b> | 1.53 | Keratinocyte miR-196a up vs Control |
| <b>GRIN2B</b>   | 1.56 | Keratinocyte miR-196a down vs Control | <b>KIR3DL2</b> | 1.65 | Keratinocyte miR-196a up vs Control |
| <b>GRPEL1</b>   | 1.53 | Keratinocyte miR-196a down vs Control | <b>KIRREL2</b> | 1.56 | Keratinocyte miR-196a up vs Control |
| <b>GTF2E2</b>   | 1.65 | Keratinocyte miR-196a down vs Control | <b>KLHL1</b>   | 1.53 | Keratinocyte miR-196a up vs Control |
| <b>H3F3B</b>    | 1.56 | Keratinocyte miR-196a down vs Control | <b>KLHL11</b>  | 1.53 | Keratinocyte miR-196a up vs Control |
| <b>HAL</b>      | 1.56 | Keratinocyte miR-196a down vs Control | <b>KLK2</b>    | 1.65 | Keratinocyte miR-196a up vs Control |
| <b>HAPLN2</b>   | 1.56 | Keratinocyte miR-196a down vs Control | <b>KNDC1</b>   | 1.56 | Keratinocyte miR-196a up vs Control |
| <b>HBLD2</b>    | 1.56 | Keratinocyte miR-196a down vs Control | <b>LCN6</b>    | 1.56 | Keratinocyte miR-196a up vs Control |
| <b>HDAC11</b>   | 1.53 | Keratinocyte miR-196a down vs Control | <b>M69296</b>  | 1.53 | Keratinocyte miR-196a up vs Control |
| <b>HEXA</b>     | 1.53 | Keratinocyte miR-196a down vs Control | <b>MAB21L2</b> | 1.53 | Keratinocyte miR-196a up vs Control |
| <b>HEXDC</b>    | 1.65 | Keratinocyte miR-196a down vs Control | <b>MAP3K3</b>  | 1.56 | Keratinocyte miR-196a up vs Control |
| <b>HIST1H3G</b> | 1.53 | Keratinocyte miR-196a down vs Control | <b>MAP4K1</b>  | 1.65 | Keratinocyte miR-196a up vs Control |
| <b>HKR3</b>     | 1.53 | Keratinocyte miR-196a down vs Control | <b>MAS1L</b>   | 1.53 | Keratinocyte miR-196a up vs Control |

|                |      |                                       |                 |      |                                     |
|----------------|------|---------------------------------------|-----------------|------|-------------------------------------|
| <b>HNRPCL1</b> | 1.53 | Keratinocyte miR-196a down vs Control | <b>MATK</b>     | 1.65 | Keratinocyte miR-196a up vs Control |
| <b>HNRPDL</b>  | 1.53 | Keratinocyte miR-196a down vs Control | <b>MEIS3P1</b>  | 1.65 | Keratinocyte miR-196a up vs Control |
| <b>HSPB9</b>   | 1.56 | Keratinocyte miR-196a down vs Control | <b>MGAT4C</b>   | 1.53 | Keratinocyte miR-196a up vs Control |
| <b>HSPC023</b> | 1.56 | Keratinocyte miR-196a down vs Control | <b>MGC26647</b> | 1.56 | Keratinocyte miR-196a up vs Control |
| <b>HTN1</b>    | 1.65 | Keratinocyte miR-196a down vs Control | <b>MGC5566</b>  | 1.53 | Keratinocyte miR-196a up vs Control |
| <b>HTR2B</b>   | 1.56 | Keratinocyte miR-196a down vs Control | <b>MIA2</b>     | 1.56 | Keratinocyte miR-196a up vs Control |
| <b>HVCN1</b>   | 1.53 | Keratinocyte miR-196a down vs Control | <b>MIDN</b>     | 1.56 | Keratinocyte miR-196a up vs Control |
| <b>IDI1</b>    | 1.53 | Keratinocyte miR-196a down vs Control | <b>MPFL</b>     | 1.56 | Keratinocyte miR-196a up vs Control |
| <b>IDI2</b>    | 1.65 | Keratinocyte miR-196a down vs Control | <b>MSR1</b>     | 1.56 | Keratinocyte miR-196a up vs Control |
| <b>IDS</b>     | 1.65 | Keratinocyte miR-196a down vs Control | <b>MTF1</b>     | 1.56 | Keratinocyte miR-196a up vs Control |
| <b>IGFBPL1</b> | 1.56 | Keratinocyte miR-196a down vs Control | <b>MYBPC3</b>   | 1.56 | Keratinocyte miR-196a up vs Control |
| <b>IL19</b>    | 1.65 | Keratinocyte miR-196a down vs Control | <b>MYH4</b>     | 1.56 | Keratinocyte miR-196a up vs Control |
| <b>INPP1</b>   | 1.65 | Keratinocyte miR-196a down vs Control | <b>MYOZ3</b>    | 1.53 | Keratinocyte miR-196a up vs Control |
| <b>IQCH</b>    | 1.56 | Keratinocyte miR-196a                 | <b>N24703</b>   | 1.56 | Keratinocyte miR-196a up vs         |

|                 |      |                                       |               |      |                                     |
|-----------------|------|---------------------------------------|---------------|------|-------------------------------------|
|                 |      | down vs Control                       |               |      | Control                             |
| <b>IQGAP2</b>   | 1.65 | Keratinocyte miR-196a down vs Control | <b>N75321</b> | 1.65 | Keratinocyte miR-196a up vs Control |
| <b>KATNB1</b>   | 1.53 | Keratinocyte miR-196a down vs Control | <b>N75427</b> | 1.65 | Keratinocyte miR-196a up vs Control |
| <b>KCND1</b>    | 1.65 | Keratinocyte miR-196a down vs Control | <b>N91552</b> | 1.65 | Keratinocyte miR-196a up vs Control |
| <b>KCNH5</b>    | 1.56 | Keratinocyte miR-196a down vs Control | <b>NCR1</b>   | 1.56 | Keratinocyte miR-196a up vs Control |
| <b>KCNK10</b>   | 1.53 | Keratinocyte miR-196a down vs Control | <b>NHLH1</b>  | 1.53 | Keratinocyte miR-196a up vs Control |
| <b>KCNMB3</b>   | 1.53 | Keratinocyte miR-196a down vs Control | <b>NPHS2</b>  | 1.53 | Keratinocyte miR-196a up vs Control |
| <b>KIAA0195</b> | 1.53 | Keratinocyte miR-196a down vs Control | <b>NUDT14</b> | 1.54 | Keratinocyte miR-196a up vs Control |
| <b>KIAA0404</b> | 1.53 | Keratinocyte miR-196a down vs Control | <b>OBFC2B</b> | 1.65 | Keratinocyte miR-196a up vs Control |
| <b>KIAA0999</b> | 1.56 | Keratinocyte miR-196a down vs Control | <b>OPCML</b>  | 1.65 | Keratinocyte miR-196a up vs Control |
| <b>KIAA1107</b> | 1.53 | Keratinocyte miR-196a down vs Control | <b>OR2J2</b>  | 1.56 | Keratinocyte miR-196a up vs Control |
| <b>KLC4</b>     | 1.56 | Keratinocyte miR-196a down vs Control | <b>OR2L13</b> | 1.56 | Keratinocyte miR-196a up vs Control |
| <b>KLHDC1</b>   | 1.53 | Keratinocyte miR-196a down vs Control | <b>OR2T8</b>  | 1.56 | Keratinocyte miR-196a up vs Control |
| <b>KLHL22</b>   | 1.53 | Keratinocyte miR-196a down vs Control | <b>OR4A15</b> | 1.53 | Keratinocyte miR-196a up vs Control |

|                  |      |                                       |                |      |                                     |
|------------------|------|---------------------------------------|----------------|------|-------------------------------------|
| <b>KRTAP15-1</b> | 1.56 | Keratinocyte miR-196a down vs Control | <b>OR51E2</b>  | 1.56 | Keratinocyte miR-196a up vs Control |
| <b>LDLRAP1</b>   | 1.53 | Keratinocyte miR-196a down vs Control | <b>OR7E47P</b> | 1.53 | Keratinocyte miR-196a up vs Control |
| <b>LEMD2</b>     | 1.56 | Keratinocyte miR-196a down vs Control | <b>OR8H1</b>   | 1.56 | Keratinocyte miR-196a up vs Control |
| <b>LGI2</b>      | 1.56 | Keratinocyte miR-196a down vs Control | <b>P2RX3</b>   | 1.56 | Keratinocyte miR-196a up vs Control |
| <b>LINS1</b>     | 1.53 | Keratinocyte miR-196a down vs Control | <b>PAK6</b>    | 1.53 | Keratinocyte miR-196a up vs Control |
| <b>LRP6</b>      | 1.53 | Keratinocyte miR-196a down vs Control | <b>PCDHA5</b>  | 1.53 | Keratinocyte miR-196a up vs Control |
| <b>LRRC25</b>    | 1.65 | Keratinocyte miR-196a down vs Control | <b>PCDHB7</b>  | 1.53 | Keratinocyte miR-196a up vs Control |
| <b>LYPLA2</b>    | 1.53 | Keratinocyte miR-196a down vs Control | <b>PCDHGC3</b> | 1.56 | Keratinocyte miR-196a up vs Control |
| <b>MAB21L1</b>   | 1.65 | Keratinocyte miR-196a down vs Control | <b>PCGF1</b>   | 1.56 | Keratinocyte miR-196a up vs Control |
| <b>MAP2</b>      | 1.65 | Keratinocyte miR-196a down vs Control | <b>PGLYRP2</b> | 1.53 | Keratinocyte miR-196a up vs Control |
| <b>MAP2K1IP1</b> | 1.53 | Keratinocyte miR-196a down vs Control | <b>PILRB</b>   | 1.56 | Keratinocyte miR-196a up vs Control |
| <b>MAPK12</b>    | 1.56 | Keratinocyte miR-196a down vs Control | <b>PLCL2</b>   | 1.53 | Keratinocyte miR-196a up vs Control |
| <b>MAPK3</b>     | 1.53 | Keratinocyte miR-196a down vs Control | <b>PLIN</b>    | 1.65 | Keratinocyte miR-196a up vs Control |
| <b>MAPKAP1</b>   | 1.53 | Keratinocyte miR-196a down vs Control | <b>PNLIP</b>   | 1.56 | Keratinocyte miR-196a up vs Control |

|                 |      |                                       |                 |      |                                     |
|-----------------|------|---------------------------------------|-----------------|------|-------------------------------------|
|                 |      | down vs Control                       |                 |      | Control                             |
| <b>MBNL1</b>    | 1.56 | Keratinocyte miR-196a down vs Control | <b>PPY2</b>     | 1.56 | Keratinocyte miR-196a up vs Control |
| <b>MED6</b>     | 1.56 | Keratinocyte miR-196a down vs Control | <b>PRAMEF2</b>  | 1.65 | Keratinocyte miR-196a up vs Control |
| <b>METRN</b>    | 1.56 | Keratinocyte miR-196a down vs Control | <b>PROX1</b>    | 1.53 | Keratinocyte miR-196a up vs Control |
| <b>MFN1</b>     | 1.53 | Keratinocyte miR-196a down vs Control | <b>PTPRCAP</b>  | 1.65 | Keratinocyte miR-196a up vs Control |
| <b>MGC10911</b> | 1.65 | Keratinocyte miR-196a down vs Control | <b>PTPRO</b>    | 1.56 | Keratinocyte miR-196a up vs Control |
| <b>MGC16037</b> | 1.53 | Keratinocyte miR-196a down vs Control | <b>RASGEF1B</b> | 1.65 | Keratinocyte miR-196a up vs Control |
| <b>MGC17403</b> | 1.56 | Keratinocyte miR-196a down vs Control | <b>RASL10B</b>  | 1.53 | Keratinocyte miR-196a up vs Control |
| <b>MLL</b>      | 1.56 | Keratinocyte miR-196a down vs Control | <b>RCV1</b>     | 1.56 | Keratinocyte miR-196a up vs Control |
| <b>MLL4</b>     | 1.53 | Keratinocyte miR-196a down vs Control | <b>RNF151</b>   | 1.56 | Keratinocyte miR-196a up vs Control |
| <b>MLZE</b>     | 1.53 | Keratinocyte miR-196a down vs Control | <b>RPL23</b>    | 1.56 | Keratinocyte miR-196a up vs Control |
| <b>MRPS5</b>    | 1.53 | Keratinocyte miR-196a down vs Control | <b>RPL24</b>    | 1.53 | Keratinocyte miR-196a up vs Control |
| <b>MTFMT</b>    | 1.53 | Keratinocyte miR-196a down vs Control | <b>RPL39</b>    | 1.53 | Keratinocyte miR-196a up vs Control |
| <b>MYH6</b>     | 1.65 | Keratinocyte miR-196a down vs Control | <b>S75896</b>   | 1.56 | Keratinocyte miR-196a up vs Control |

|               |      |                                       |                  |      |                                     |
|---------------|------|---------------------------------------|------------------|------|-------------------------------------|
| <b>NAG8</b>   | 1.53 | Keratinocyte miR-196a down vs Control | <b>SBEM</b>      | 1.56 | Keratinocyte miR-196a up vs Control |
| <b>NMNAT1</b> | 1.53 | Keratinocyte miR-196a down vs Control | <b>SCAMP5</b>    | 1.56 | Keratinocyte miR-196a up vs Control |
| <b>NOL10</b>  | 1.65 | Keratinocyte miR-196a down vs Control | <b>SCGN</b>      | 1.53 | Keratinocyte miR-196a up vs Control |
| <b>NOMO1</b>  | 1.53 | Keratinocyte miR-196a down vs Control | <b>SCNN1G</b>    | 1.56 | Keratinocyte miR-196a up vs Control |
| <b>NPLOC4</b> | 1.65 | Keratinocyte miR-196a down vs Control | <b>SEC14L3</b>   | 1.56 | Keratinocyte miR-196a up vs Control |
| <b>NSDHL</b>  | 1.65 | Keratinocyte miR-196a down vs Control | <b>SEPN1</b>     | 1.53 | Keratinocyte miR-196a up vs Control |
| <b>NSFL1C</b> | 1.53 | Keratinocyte miR-196a down vs Control | <b>SERPINA12</b> | 1.56 | Keratinocyte miR-196a up vs Control |
| <b>NT5C2</b>  | 1.53 | Keratinocyte miR-196a down vs Control | <b>SERPINA4</b>  | 1.53 | Keratinocyte miR-196a up vs Control |
| <b>NT5C3L</b> | 1.53 | Keratinocyte miR-196a down vs Control | <b>SERPINI2</b>  | 1.65 | Keratinocyte miR-196a up vs Control |
| <b>NT5DC2</b> | 1.53 | Keratinocyte miR-196a down vs Control | <b>SGEF</b>      | 1.53 | Keratinocyte miR-196a up vs Control |
| <b>NUBP2</b>  | 1.56 | Keratinocyte miR-196a down vs Control | <b>SLC11A1</b>   | 1.56 | Keratinocyte miR-196a up vs Control |
| <b>NUPL2</b>  | 1.53 | Keratinocyte miR-196a down vs Control | <b>SLC25A28</b>  | 1.53 | Keratinocyte miR-196a up vs Control |
| <b>NXN</b>    | 1.53 | Keratinocyte miR-196a down vs Control | <b>SLC2A2</b>    | 1.56 | Keratinocyte miR-196a up vs Control |
| <b>OKL38</b>  | 1.53 | Keratinocyte miR-196a down vs Control | <b>SLC38A4</b>   | 1.56 | Keratinocyte miR-196a up vs Control |

|                |      |                                       |                   |      |                                     |
|----------------|------|---------------------------------------|-------------------|------|-------------------------------------|
|                |      | down vs Control                       |                   |      | Control                             |
| <b>OSAP</b>    | 1.53 | Keratinocyte miR-196a down vs Control | <b>SLFN13</b>     | 1.53 | Keratinocyte miR-196a up vs Control |
| <b>OSGEPL1</b> | 1.56 | Keratinocyte miR-196a down vs Control | <b>SOLH</b>       | 1.65 | Keratinocyte miR-196a up vs Control |
| <b>PACS2</b>   | 1.53 | Keratinocyte miR-196a down vs Control | <b>SOX11</b>      | 1.53 | Keratinocyte miR-196a up vs Control |
| <b>PCDHA9</b>  | 1.65 | Keratinocyte miR-196a down vs Control | <b>SOX2OT</b>     | 1.56 | Keratinocyte miR-196a up vs Control |
| <b>PDLIM2</b>  | 1.65 | Keratinocyte miR-196a down vs Control | <b>SPDYA</b>      | 1.65 | Keratinocyte miR-196a up vs Control |
| <b>PEX12</b>   | 1.53 | Keratinocyte miR-196a down vs Control | <b>SPOCK2</b>     | 1.53 | Keratinocyte miR-196a up vs Control |
| <b>PEX16</b>   | 1.53 | Keratinocyte miR-196a down vs Control | <b>SPRR2C</b>     | 1.53 | Keratinocyte miR-196a up vs Control |
| <b>PGEA1</b>   | 1.53 | Keratinocyte miR-196a down vs Control | <b>ST6GALNAC3</b> | 1.65 | Keratinocyte miR-196a up vs Control |
| <b>PGF</b>     | 1.56 | Keratinocyte miR-196a down vs Control | <b>STYX</b>       | 1.53 | Keratinocyte miR-196a up vs Control |
| <b>PIGS</b>    | 1.53 | Keratinocyte miR-196a down vs Control | <b>SULT4A1</b>    | 1.56 | Keratinocyte miR-196a up vs Control |
| <b>PITPNM1</b> | 1.65 | Keratinocyte miR-196a down vs Control | <b>SYCE1</b>      | 1.53 | Keratinocyte miR-196a up vs Control |
| <b>PLEKHA8</b> | 1.53 | Keratinocyte miR-196a down vs Control | <b>TAAR2</b>      | 1.56 | Keratinocyte miR-196a up vs Control |
| <b>PLXNB1</b>  | 1.65 | Keratinocyte miR-196a down vs Control | <b>TARP</b>       | 1.53 | Keratinocyte miR-196a up vs Control |



|                |      |                                       |                |      |                                     |
|----------------|------|---------------------------------------|----------------|------|-------------------------------------|
| <b>PLXNB2</b>  | 1.56 | Keratinocyte miR-196a down vs Control | <b>TAS1R1</b>  | 1.65 | Keratinocyte miR-196a up vs Control |
| <b>PLXNB3</b>  | 1.53 | Keratinocyte miR-196a down vs Control | <b>TBC1D21</b> | 1.56 | Keratinocyte miR-196a up vs Control |
| <b>POLDIP3</b> | 1.53 | Keratinocyte miR-196a down vs Control | <b>TKTL1</b>   | 1.53 | Keratinocyte miR-196a up vs Control |
| <b>POLR1E</b>  | 1.53 | Keratinocyte miR-196a down vs Control | <b>TMEM9B</b>  | 1.56 | Keratinocyte miR-196a up vs Control |
| <b>POLR3K</b>  | 1.53 | Keratinocyte miR-196a down vs Control | <b>TMPRSS9</b> | 1.65 | Keratinocyte miR-196a up vs Control |
| <b>POR</b>     | 1.56 | Keratinocyte miR-196a down vs Control | <b>TNNT2</b>   | 1.56 | Keratinocyte miR-196a up vs Control |
| <b>PPFIBP2</b> | 1.53 | Keratinocyte miR-196a down vs Control | <b>TNRC6C</b>  | 1.56 | Keratinocyte miR-196a up vs Control |
| <b>PRKRIP1</b> | 1.56 | Keratinocyte miR-196a down vs Control | <b>TPH2</b>    | 1.56 | Keratinocyte miR-196a up vs Control |
| <b>PROK1</b>   | 1.53 | Keratinocyte miR-196a down vs Control | <b>TRAPPC5</b> | 1.65 | Keratinocyte miR-196a up vs Control |
| <b>PRP2</b>    | 1.53 | Keratinocyte miR-196a down vs Control | <b>TRIM40</b>  | 1.65 | Keratinocyte miR-196a up vs Control |
| <b>PRUNE</b>   | 1.53 | Keratinocyte miR-196a down vs Control | <b>TRIM42</b>  | 1.65 | Keratinocyte miR-196a up vs Control |
| <b>PSMA7</b>   | 1.53 | Keratinocyte miR-196a down vs Control | <b>TTPA</b>    | 1.56 | Keratinocyte miR-196a up vs Control |
| <b>PSMC5</b>   | 1.56 | Keratinocyte miR-196a down vs Control | <b>TYRP1</b>   | 1.53 | Keratinocyte miR-196a up vs Control |
| <b>PSMD2</b>   | 1.53 | Keratinocyte miR-196a down vs Control | <b>UBE2O</b>   | 1.65 | Keratinocyte miR-196a up vs Control |

|                |      |                                       |                |      |                                     |
|----------------|------|---------------------------------------|----------------|------|-------------------------------------|
|                |      | down vs Control                       |                |      | Control                             |
| <b>PSMF1</b>   | 1.53 | Keratinocyte miR-196a down vs Control | <b>UGT2B10</b> | 1.56 | Keratinocyte miR-196a up vs Control |
| <b>PTPMT1</b>  | 1.53 | Keratinocyte miR-196a down vs Control | <b>ULBP3</b>   | 1.65 | Keratinocyte miR-196a up vs Control |
| <b>PVRL2</b>   | 1.53 | Keratinocyte miR-196a down vs Control | <b>UNQ755</b>  | 1.56 | Keratinocyte miR-196a up vs Control |
| <b>QARS</b>    | 1.53 | Keratinocyte miR-196a down vs Control | <b>UPB1</b>    | 1.56 | Keratinocyte miR-196a up vs Control |
| <b>RAB26</b>   | 1.56 | Keratinocyte miR-196a down vs Control | <b>USP29</b>   | 1.56 | Keratinocyte miR-196a up vs Control |
| <b>RAB5B</b>   | 1.53 | Keratinocyte miR-196a down vs Control | <b>USP51</b>   | 1.65 | Keratinocyte miR-196a up vs Control |
| <b>RABGEF1</b> | 1.56 | Keratinocyte miR-196a down vs Control | <b>USP9Y</b>   | 1.56 | Keratinocyte miR-196a up vs Control |
| <b>RABGGTA</b> | 1.53 | Keratinocyte miR-196a down vs Control | <b>VAX2</b>    | 1.53 | Keratinocyte miR-196a up vs Control |
| <b>RAG1AP1</b> | 1.53 | Keratinocyte miR-196a down vs Control | <b>VN1R1</b>   | 1.56 | Keratinocyte miR-196a up vs Control |
| <b>RANGAP1</b> | 1.53 | Keratinocyte miR-196a down vs Control | <b>W45382</b>  | 1.56 | Keratinocyte miR-196a up vs Control |
| <b>RAP1A</b>   | 1.56 | Keratinocyte miR-196a down vs Control | <b>W95609</b>  | 1.53 | Keratinocyte miR-196a up vs Control |
| <b>RGS19</b>   | 1.53 | Keratinocyte miR-196a down vs Control | <b>WDR25</b>   | 1.65 | Keratinocyte miR-196a up vs Control |
| <b>RHOT2</b>   | 1.65 | Keratinocyte miR-196a down vs Control | <b>WDR63</b>   | 1.56 | Keratinocyte miR-196a up vs Control |

|                |      |                                       |               |      |                                     |
|----------------|------|---------------------------------------|---------------|------|-------------------------------------|
| <b>RND1</b>    | 1.53 | Keratinocyte miR-196a down vs Control | <b>WNT3</b>   | 1.56 | Keratinocyte miR-196a up vs Control |
| <b>RNF150</b>  | 1.65 | Keratinocyte miR-196a down vs Control | <b>WWC3</b>   | 1.56 | Keratinocyte miR-196a up vs Control |
| <b>RPL18</b>   | 1.65 | Keratinocyte miR-196a down vs Control | <b>ZIC2</b>   | 1.65 | Keratinocyte miR-196a up vs Control |
| <b>RPL7L1</b>  | 1.65 | Keratinocyte miR-196a down vs Control | <b>ZNF287</b> | 1.65 | Keratinocyte miR-196a up vs Control |
| <b>RPS16</b>   | 1.53 | Keratinocyte miR-196a down vs Control | <b>ZNF420</b> | 1.53 | Keratinocyte miR-196a up vs Control |
| <b>RPS6KB1</b> | 1.56 | Keratinocyte miR-196a down vs Control | <b>ZNF445</b> | 1.65 | Keratinocyte miR-196a up vs Control |
| <b>RPS6KB2</b> | 1.53 | Keratinocyte miR-196a down vs Control | <b>ZNF473</b> | 1.53 | Keratinocyte miR-196a up vs Control |
| <b>RTP1</b>    | 1.65 | Keratinocyte miR-196a down vs Control | <b>ZNF625</b> | 1.56 | Keratinocyte miR-196a up vs Control |
| <b>RUTBC1</b>  | 1.53 | Keratinocyte miR-196a down vs Control | <b>ZNF676</b> | 1.56 | Keratinocyte miR-196a up vs Control |
| <b>S80491</b>  | 1.56 | Keratinocyte miR-196a down vs Control | <b>ZNF694</b> | 1.56 | Keratinocyte miR-196a up vs Control |
| <b>SAMM50</b>  | 1.53 | Keratinocyte miR-196a down vs Control | <b>ZP3</b>    | 1.53 | Keratinocyte miR-196a up vs Control |
| <b>SBF1</b>    | 1.56 | Keratinocyte miR-196a down vs Control | <b>ZPBP2</b>  | 1.56 | Keratinocyte miR-196a up vs Control |
| <b>SC4MOL</b>  | 1.53 | Keratinocyte miR-196a down vs Control |               |      |                                     |
| <b>SEC22B</b>  | 1.53 | Keratinocyte miR-196a                 |               |      |                                     |

|                |      |                                          |
|----------------|------|------------------------------------------|
|                |      | down vs Control                          |
| <b>SEC24C</b>  | 1.53 | Keratinocyte miR-196a<br>down vs Control |
| <b>SGPP2</b>   | 1.53 | Keratinocyte miR-196a<br>down vs Control |
| <b>SHKBP1</b>  | 1.53 | Keratinocyte miR-196a<br>down vs Control |
| <b>SIRT6</b>   | 1.56 | Keratinocyte miR-196a<br>down vs Control |
| <b>SIRT7</b>   | 1.65 | Keratinocyte miR-196a<br>down vs Control |
| <b>SLC22A6</b> | 1.53 | Keratinocyte miR-196a<br>down vs Control |
| <b>SLC27A4</b> | 1.53 | Keratinocyte miR-196a<br>down vs Control |
| <b>SLC2A4</b>  | 1.65 | Keratinocyte miR-196a<br>down vs Control |
| <b>SLC30A4</b> | 1.56 | Keratinocyte miR-196a<br>down vs Control |
| <b>SLC44A5</b> | 1.53 | Keratinocyte miR-196a<br>down vs Control |
| <b>SLC4A7</b>  | 1.53 | Keratinocyte miR-196a<br>down vs Control |
| <b>SLC5A7</b>  | 1.56 | Keratinocyte miR-196a<br>down vs Control |
| <b>SLC7A14</b> | 1.56 | Keratinocyte miR-196a<br>down vs Control |

|                |      |                                          |
|----------------|------|------------------------------------------|
| <b>SLC7A7</b>  | 1.56 | Keratinocyte miR-196a<br>down vs Control |
| <b>SMPD1</b>   | 1.53 | Keratinocyte miR-196a<br>down vs Control |
| <b>SNRPA1</b>  | 1.53 | Keratinocyte miR-196a<br>down vs Control |
| <b>SNX17</b>   | 1.53 | Keratinocyte miR-196a<br>down vs Control |
| <b>SPAG16</b>  | 1.53 | Keratinocyte miR-196a<br>down vs Control |
| <b>SPAG4L</b>  | 1.56 | Keratinocyte miR-196a<br>down vs Control |
| <b>SPAG7</b>   | 1.65 | Keratinocyte miR-196a<br>down vs Control |
| <b>SPAST</b>   | 1.53 | Keratinocyte miR-196a<br>down vs Control |
| <b>SRD5A1</b>  | 1.53 | Keratinocyte miR-196a<br>down vs Control |
| <b>SRP68</b>   | 1.53 | Keratinocyte miR-196a<br>down vs Control |
| <b>SSBP4</b>   | 1.56 | Keratinocyte miR-196a<br>down vs Control |
| <b>SSX8</b>    | 1.65 | Keratinocyte miR-196a<br>down vs Control |
| <b>ST3GAL4</b> | 1.53 | Keratinocyte miR-196a<br>down vs Control |
| <b>STAB2</b>   | 1.65 | Keratinocyte miR-196a                    |

|                 |      |                                          |
|-----------------|------|------------------------------------------|
|                 |      | down vs Control                          |
| <b>STARD7</b>   | 1.53 | Keratinocyte miR-196a<br>down vs Control |
| <b>STK17B</b>   | 1.53 | Keratinocyte miR-196a<br>down vs Control |
| <b>STK19</b>    | 1.56 | Keratinocyte miR-196a<br>down vs Control |
| <b>STK25</b>    | 1.53 | Keratinocyte miR-196a<br>down vs Control |
| <b>STK32C</b>   | 1.65 | Keratinocyte miR-196a<br>down vs Control |
| <b>STOML3</b>   | 1.56 | Keratinocyte miR-196a<br>down vs Control |
| <b>STXBP2</b>   | 1.53 | Keratinocyte miR-196a<br>down vs Control |
| <b>SUMO1</b>    | 1.65 | Keratinocyte miR-196a<br>down vs Control |
| <b>SUV420H2</b> | 1.56 | Keratinocyte miR-196a<br>down vs Control |
| <b>TAPBP</b>    | 1.53 | Keratinocyte miR-196a<br>down vs Control |
| <b>TAX1BP3</b>  | 1.56 | Keratinocyte miR-196a<br>down vs Control |
| <b>TBC1D5</b>   | 1.53 | Keratinocyte miR-196a<br>down vs Control |
| <b>TBL3</b>     | 1.53 | Keratinocyte miR-196a<br>down vs Control |

|                  |      |                                          |
|------------------|------|------------------------------------------|
| <b>TEC</b>       | 1.65 | Keratinocyte miR-196a<br>down vs Control |
| <b>THAP7</b>     | 1.56 | Keratinocyte miR-196a<br>down vs Control |
| <b>THOC5</b>     | 1.53 | Keratinocyte miR-196a<br>down vs Control |
| <b>THSD3</b>     | 1.65 | Keratinocyte miR-196a<br>down vs Control |
| <b>THUMPD3</b>   | 1.53 | Keratinocyte miR-196a<br>down vs Control |
| <b>TJP3</b>      | 1.53 | Keratinocyte miR-196a<br>down vs Control |
| <b>TM4SF1</b>    | 1.53 | Keratinocyte miR-196a<br>down vs Control |
| <b>TMEM16J</b>   | 1.53 | Keratinocyte miR-196a<br>down vs Control |
| <b>TMEM68</b>    | 1.56 | Keratinocyte miR-196a<br>down vs Control |
| <b>TMEM85</b>    | 1.56 | Keratinocyte miR-196a<br>down vs Control |
| <b>TMPRSS11E</b> | 1.53 | Keratinocyte miR-196a<br>down vs Control |
| <b>TNIP2</b>     | 1.53 | Keratinocyte miR-196a<br>down vs Control |
| <b>TNRC5</b>     | 1.53 | Keratinocyte miR-196a<br>down vs Control |
| <b>TNT</b>       | 1.56 | Keratinocyte miR-196a                    |

|                |      |                                          |
|----------------|------|------------------------------------------|
|                |      | down vs Control                          |
| <b>TOM1</b>    | 1.53 | Keratinocyte miR-196a<br>down vs Control |
| <b>TPCN2</b>   | 1.53 | Keratinocyte miR-196a<br>down vs Control |
| <b>TSR2</b>    | 1.53 | Keratinocyte miR-196a<br>down vs Control |
| <b>TTC4</b>    | 1.53 | Keratinocyte miR-196a<br>down vs Control |
| <b>TTC5</b>    | 1.53 | Keratinocyte miR-196a<br>down vs Control |
| <b>TTF1</b>    | 1.53 | Keratinocyte miR-196a<br>down vs Control |
| <b>TTY21</b>   | 1.65 | Keratinocyte miR-196a<br>down vs Control |
| <b>TUBGCP2</b> | 1.53 | Keratinocyte miR-196a<br>down vs Control |
| <b>TUBGCP6</b> | 1.65 | Keratinocyte miR-196a<br>down vs Control |
| <b>TXK</b>     | 1.56 | Keratinocyte miR-196a<br>down vs Control |
| <b>TXNDC12</b> | 1.53 | Keratinocyte miR-196a<br>down vs Control |
| <b>TYSND1</b>  | 1.53 | Keratinocyte miR-196a<br>down vs Control |
| <b>UCKL1</b>   | 1.56 | Keratinocyte miR-196a<br>down vs Control |



|                |      |                                          |
|----------------|------|------------------------------------------|
| <b>ULK3</b>    | 1.53 | Keratinocyte miR-196a<br>down vs Control |
| <b>USP19</b>   | 1.56 | Keratinocyte miR-196a<br>down vs Control |
| <b>USP5</b>    | 1.53 | Keratinocyte miR-196a<br>down vs Control |
| <b>VPS13B</b>  | 1.53 | Keratinocyte miR-196a<br>down vs Control |
| <b>VRK3</b>    | 1.53 | Keratinocyte miR-196a<br>down vs Control |
| <b>WDR27</b>   | 1.53 | Keratinocyte miR-196a<br>down vs Control |
| <b>WDR42A</b>  | 1.53 | Keratinocyte miR-196a<br>down vs Control |
| <b>WFIKKN1</b> | 1.53 | Keratinocyte miR-196a<br>down vs Control |
| <b>YARS</b>    | 1.53 | Keratinocyte miR-196a<br>down vs Control |
| <b>YRDC</b>    | 1.56 | Keratinocyte miR-196a<br>down vs Control |
| <b>ZBTB25</b>  | 1.65 | Keratinocyte miR-196a<br>down vs Control |
| <b>ZBTB38</b>  | 1.56 | Keratinocyte miR-196a<br>down vs Control |
| <b>ZC3H3</b>   | 1.65 | Keratinocyte miR-196a<br>down vs Control |
| <b>ZC3H7A</b>  | 1.53 | Keratinocyte miR-196a                    |

|               |      |                                          |
|---------------|------|------------------------------------------|
|               |      | down vs Control                          |
| <b>ZFAND1</b> | 1.65 | Keratinocyte miR-196a<br>down vs Control |
| <b>ZMYM6</b>  | 1.53 | Keratinocyte miR-196a<br>down vs Control |
| <b>ZNF175</b> | 1.56 | Keratinocyte miR-196a<br>down vs Control |
| <b>ZNF263</b> | 1.56 | Keratinocyte miR-196a<br>down vs Control |
| <b>ZNF343</b> | 1.53 | Keratinocyte miR-196a<br>down vs Control |
| <b>ZNF461</b> | 1.56 | Keratinocyte miR-196a<br>down vs Control |
| <b>ZNF514</b> | 1.53 | Keratinocyte miR-196a<br>down vs Control |
| <b>ZNF547</b> | 1.65 | Keratinocyte miR-196a<br>down vs Control |
| <b>ZNF552</b> | 1.53 | Keratinocyte miR-196a<br>down vs Control |
| <b>ZNF563</b> | 1.56 | Keratinocyte miR-196a<br>down vs Control |
| <b>ZNF57</b>  | 1.53 | Keratinocyte miR-196a<br>down vs Control |
| <b>ZNF570</b> | 1.65 | Keratinocyte miR-196a<br>down vs Control |
| <b>ZNF597</b> | 1.53 | Keratinocyte miR-196a<br>down vs Control |

|               |      |                                          |
|---------------|------|------------------------------------------|
| <b>ZNF70</b>  | 1.53 | Keratinocyte miR-196a<br>down vs Control |
| <b>ZNF702</b> | 1.65 | Keratinocyte miR-196a<br>down vs Control |
| <b>ZNF718</b> | 1.53 | Keratinocyte miR-196a<br>down vs Control |
|               |      |                                          |
